1 **Stochastic Model of Neuronal Outgrowth Movement: UNC-5 (UNC5) Regulates the Length**  
2 **and Number of Neuronal Processes in *Caenorhabditis elegans***

3

4 Gerard Limerick<sup>\*</sup>, †, Xia Tang<sup>\*</sup>, †, Won Suk Lee<sup>\*</sup>, †, Ahmed Mohamed<sup>\*</sup>, Aseel Al-Aamiri<sup>\*</sup>, and  
5 William G. Wadsworth<sup>\*</sup>

6

7 <sup>\*</sup>Department of Pathology and Laboratory Medicine, Rutgers Robert Wood Johnson Medical  
8 School, Piscataway, NJ 08854

9

10 †These authors contributed equally to this work

11 running title: neuronal outgrowth patterning

12

13 key words: neuronal development, axon guidance, asymmetric localization, *Caenorhabditis*

14 *elegans*, netrin and wnt signaling

15

16 corresponding author:

17 William G. Wadsworth

18 Department of Pathology and Laboratory Medicine

19 Rutgers Robert Wood Johnson Medical School

20 675 Hoes Lane West

21 Piscataway, NJ 08854-5635

22 732-235-5768

23 [william.wadsworth@rwjms.rutgers.edu](mailto:william.wadsworth@rwjms.rutgers.edu)

## 24 **Abstract**

25 Neurons extend processes that vary in number, length, and direction of outgrowth.  
26 Extracellular cues help determine the patterning of outgrowth. In *Caenorhabditis elegans*,  
27 neurons respond to the extracellular UNC-6 (netrin) cue via UNC-40 (DCC) and UNC-5 (UNC5)  
28 receptors. We have postulated that UNC-40 undergoes stochastically orientated asymmetric  
29 localization (SOAL) within neurons. Extracellular cues govern the probability of UNC-40  
30 localizing and mediating outgrowth at points along the surface of the neuron. For each instance  
31 of time there is a probability that UNC-40-mediated outgrowth will occur in a specific direction  
32 and so over time the direction of outgrowth fluctuates. Random walk modeling predicts that  
33 the degree of fluctuation affects the extent of outgrowth movement. Therefore, different  
34 patterns of outgrowth could be caused by regulating UNC-40 SOAL. Here we present evidence  
35 that UNC-5 (UNC5) receptor activity regulates UNC-40 SOAL and affects the length and number  
36 of processes that neurons develop. We find that loss of UNC-5 function increases the  
37 probability of UNC-40-mediated outgrowth in different directions, thereby increasing the  
38 degree of fluctuation. Consistent with the model, in *unc-5* loss-of-function mutants neurons fail  
39 to extend processes to full length or fail to develop multiple processes. We further show  
40 genetic interactions that suggest the UNC-5 and SAX-3 (Robo) receptors, and the cytoplasmic  
41 proteins, UNC-53 (NAV2), MIG-15 (NIK kinase), and MADD-2 (TRIM), function through specific  
42 signaling pathways to regulate UNC-40 SOAL in response to the UNC-6 and EGL-20 (wnt)  
43 extracellular cues. We propose genes influence the patterning of neuronal outgrowth by  
44 regulating the SOAL process.

## 45 **Introduction**

46 During development, an intricate network of neuronal connections is established. As processes  
47 extend from the neuronal cell bodies, distinct patterns of outgrowth emerge. Some extensions  
48 remain as a single process, whereas others branch and form multiple processes. If they branch,  
49 the extensions can travel in the same or in different directions. Processes vary in length.  
50 Extracellular cues are known to influence this patterning, but the underlying logic that governs  
51 the formation of patterns remains a mystery.

52

53 The secreted extracellular UNC-6 (netrin) molecule and its receptors, UNC-5 (UNC5) and UNC-40  
54 (DCC) are highly conserved in invertebrates and vertebrates, and are known to play key roles in cell  
55 and axon migrations. In *Caenorhabditis elegans*, UNC-6 is produced by ventral cells in the midbody  
56 and by glia cells at the nerve ring in the head (WADSWORTH *et al.* 1996; WADSWORTH AND  
57 HEDGECK 1996; ASAKURA *et al.* 2007). It's been observed that neurons that express the receptor  
58 UNC-40 (DCC) extend axons ventrally, towards the UNC-6 sources; whereas neurons that express  
59 the receptor UNC-5 (UNC5) alone or in combination with UNC-40 extend axons dorsally, away from  
60 the UNC-6 sources (HEDGECK *et al.* 1990; LEUNG-HAGESTEIJN *et al.* 1992; CHAN *et al.* 1996;  
61 WADSWORTH *et al.* 1996).

62

63 It is commonly proposed that axons are guided by attractive and repulsive mechanisms (Tessier-  
64 Lavigne and Goodman 1996). According to this model, extracellular cues act as attractants or  
65 repellants to direct neuronal outgrowth towards or away from sources of the cues. UNC-5 (UNC5)  
66 has been described as a “repulsive” netrin receptor because it mediates guidance away from netrin  
67 sources (Leung-Hagesteijn *et al.* 1992; Hong *et al.* 1999; Keleman and Dickson 2001; Moore *et*  
68 *al.* 2007). The attraction and repulsion model is deterministic. That is, given the same

69 conditions, the response of the neuron, attractive or repulsive, will always be the same. As  
70 such, the neuronal response to a particular cue is thought to be mediated by attractive or  
71 repulsive signaling pathways. In genetic studies, a mutation that disrupts movement towards  
72 the cue source denotes gene function within an attractive pathway, whereas mutations that  
73 disrupt movement away from a source denotes gene function within a repulsive pathway.  
74 Furthermore, the model predicts that the responsiveness of a neuron must switch from  
75 attractive to repulsive if the axonal growth cone move towards and then away from the source  
76 of a cue.

77

78 We have proposed an alternative model in which the movement of neuronal outgrowth is  
79 established through a stochastic process. This model is based on evidence indicating that the  
80 asymmetrical localization of UNC-40 in the neuron is self-organizing and that the surface to  
81 which UNC-40 localizes and mediates outgrowth is stochastically determined (Figure 1A) (XU *et*  
82 *al.* 2009; KULKARNI *et al.* 2013). Because of this process, which we name “stochastically  
83 orientated asymmetric localization” (SOAL), there is a probability that UNC-40-mediated  
84 outgrowth will take place at each point along the surface of the neuron. At any instance of time,  
85 extracellular cues govern the probability of UNC-40-mediated outgrowth at each point  
86 (KULKARNI *et al.* 2013; TANG AND WADSWORTH 2014; YANG *et al.* 2014). Outgrowth extension can  
87 be envisioned as a series of steps, where at each step extracellular cues control the probability  
88 for outgrowth in each direction from the point on the surface. This means that over time, the  
89 direction of outgrowth movement fluctuates. Such movement can be mathematically described  
90 as a random walk, *i.e.* a succession of randomly directed steps (Figure 1B). Random walk  
91 movement is diffusive and one property of diffusive motion is that the mean square  
92 displacement grows proportionate to the time traveled. Consequently, the more the direction  
93 of movement fluctuates, the shorter the distance of travel is in a given amount of time (Figure

94 1B). In this paper, we propose that UNC-5 helps regulate this fluctuation and, therefore, the  
95 extent of outgrowth movement (Figure 1A). In the neuron, this diffusive motion occurs at the  
96 micro-scale as innumerable forces act upon the membrane. An increase in diffusive motion at  
97 the micro-scale might be observed at the macro-scale as a decrease in the rate of outgrowth.  
98  
99 In this model, guidance cues promote or inhibit outgrowth but they do not intrinsically cause  
100 an attractive or repulsive directional response. This is because the direction of outgrowth is  
101 determined by a directional bias that is created over time by the combined effect of  
102 extracellular cues. In the example illustrated in Figure 2A, a neuronal protrusion experiences  
103 an extracellular guidance cue(s) (orange) that is present in a posterior (right) to anterior (left)  
104 increasing concentration gradient. This cue acts together with other cues (purple and blue)  
105 that set the probability of outgrowth in the dorsal and ventral directions. As long as the  
106 probabilities of dorsal and ventral outgrowth are equal, a bias for anterior movement over time  
107 is created. For example, at time 1 (Figure 2A top) the probability of anterior outgrowth is 0.8,  
108 whereas the probability of dorsal outgrowth is 0.1 and probability of ventral outgrowth is 0.1.  
109 As the protrusion travels in the anterior direction it encounters higher levels of the cue. Even if  
110 the cue inhibits outgrowth, an anterior directional bias towards the source of that cue can be  
111 maintained. For example, at time 2 (Figure 2B bottom), the probability of anterior outgrowth  
112 may have been reduced to 0.4 because of the inhibitory effect of the cue. Assuming that  
113 signaling mechanisms within the neuron remain relatively constant as the protrusion  
114 transverses this environment, the probabilities of dorsal and ventral outgrowth will increase  
115 (the sum of the probabilities must equal one because of SOAL). Therefore, the probability of  
116 dorsal outgrowth will be 0.3 and the probability of ventral outgrowth will be 0.3 in this  
117 example. While this increases the back and forth fluctuation that occurs perpendicular to the

118 direction of outgrowth, it does not change the directional bias that occurs over time and  
119 movement will still be towards the inhibitory cue.

120

121 The model makes predictions about patterns of outgrowth in response to extracellular cues. In  
122 this example, the neuron's response to the extracellular cues does not have an effect on the  
123 directional bias. However, random walk modeling (shown above each diagram and explained  
124 in detail later) predicts that a change in the degree to which the direction of outgrowth  
125 movement fluctuates will alter the extent of outgrowth. The pattern of outgrowth can be  
126 influenced by how great the fluctuation becomes as outgrowth moves towards a source of a  
127 cue. For example, if the fluctuation becomes significant as a protrusion moves towards the  
128 source, outgrowth will stall before reaching the source. However, if the fluctuation is not great  
129 enough at the source of the cue, outgrowth could continue to move forward. This is because the  
130 probability of movement in the opposite, inward, direction is low. For instance, a probability of  
131 0.33 anterior, 0.33 dorsal, and 0.33 ventral outgrowth still creates an anterior directional bias.  
132 Therefore, in contrast to the attraction and repulsion model, this model does not predict that  
133 movement across a source of a cue requires the neuron to switch its responsiveness to the cue.

134

135 In the discussion above, a protrusion moves toward the source of an inhibitory cue. However, a  
136 similar prediction can be made for movement towards the source of a cue that promotes  
137 outgrowth. Assuming that receptor levels at each surface and signaling mechanisms remain  
138 relatively constant as the protrusion transverses this environment, the probabilities of dorsal  
139 and ventral outgrowth will increase as more receptors at these surfaces are stimulated due to  
140 an increasing concentration of the cue. Correspondingly, the probability of outgrowth at the

141 anterior surface will decrease because of SOAL. As with the case of the inhibitory cue, the  
142 result is an increase in the degree to which the direction of outgrowth fluctuates.

143

144 The SOAL model makes predictions about how guidance genes might affect outgrowth  
145 patterning. The SOAL process allows the direction of outgrowth activity to fluctuate. In Figure  
146 2, the relative degree to which UNC-40-mediated (red) and nonUNC-40-mediated (green)  
147 outgrowth activity fluctuates under different circumstances is depicted by the extent to which  
148 the colored areas cover the neuron's surface. Extracellular cues can influence the degree to  
149 which the direction of outgrowth fluctuates (Figure 2A). Likewise, mutations that disrupt the  
150 UNC-40 SOAL process could also change the degree to which the direction of UNC-40-mediated  
151 outgrowth fluctuates. By altering the extent of outgrowth movement, these genes could  
152 regulate the length of a neuron's extension (Figure 2B). In addition to length, the model  
153 predicts that the number of processes may be affected. Since extracellular cues are not  
154 uniformly distributed across a neuron's surface, the extent of outgrowth movement could vary  
155 along the leading-edge surface of a neuron, leading to multiple outgrowths extending in the  
156 same direction. Such phenotypes might not have been associated with guidance genes since  
157 most genetic studies have focused on only whether movement is disrupted towards or away  
158 from the source of a cue. UNC-5, in particular, has been regarded as the quintessential  
159 repulsive guidance receptor and *unc-5* mutations are most often interpreted using this  
160 perspective.

161

162 Because we observed that UNC-5 affects UNC-40 SOAL (KULKARNI *et al.* 2013), we hypothesized  
163 that *unc-5* might regulate the length and number of neuronal processes. Therefore, we decided  
164 to look at neuronal outgrowth patterns in *unc-5* mutants for changes in the length and number



165 of processes. In particular, we focused on outgrowth that was not directed away from UNC-6  
166 sources since the SOAL model predicts that these outgrowth patterns are not caused by a  
167 repulsion mechanism and that they should occur independently of the direction of outgrowth.  
168 We further reasoned that if *unc-5* regulates this type of patterning then UNC-40 SOAL might be  
169 regulated by specific genetic pathways. We therefore asked whether genetic interactions  
170 between *unc-5* and other guidance genes can affect UNC-40 SOAL.

171

172 In this paper, we present genetic evidence that UNC-5 regulates the length and number of  
173 processes that neurons development. We argue that these results can be interpreted using the  
174 SOAL model. We also show genetic interactions that suggest the UNC-5 and SAX-3 (Robo)  
175 receptors, and the cytoplasmic proteins, UNC-53 (NAV2), MIG-15 (NIK kinase), and MADD-2  
176 (TRIM), function through specific signaling pathways to regulate UNC-40 SOAL in response to  
177 the UNC-6 and EGL-20 (wnt) extracellular cues. Together these results suggest that the SOAL  
178 model is useful for understanding how genes regulate patterns of outgrowth.

179

## 180 **Materials and Methods**

### 181 **Strains**

182 Strains were handled at 20 °C using standard methods (Brenner, 1974) unless stated  
183 otherwise. A Bristol strain N2 was used as wild type. The following alleles were used: **LG I**, *unc-*  
184 *40(e1430)*, *unc-40(ur304)*, *zdl5[mec-4::GFP]*; **LG II**, *unc-53(n152)*; **LG IV**, *unc-5(e152)*, *unc-*  
185 *5(e53)*, *unc-5(ev480)*, *unc-5(ev585)*, *egl-20(n585)*, *kyIs262[unc-86::myr-GFP;odr-1::dsRed]*; **LG IV**,  
186 *madd-2(ky592)*, *madd-2(tr103)*; **LG X**, *mig-15(rh148)*, *unc-6(ev400)*, *sax-3(ky123)*, *sax-3(ky200)*.  
187 Transgenes maintained as extrachromosomal arrays included: *kyEx1212 [unc-86::unc-40-*  
188 *GFP;odr-1::dsRed]*.

189

### 190 **Analysis of axon outgrowth and cell body position**

191 HSN neurons were visualized using expression of the transgene *kyIs262[unc-86::myr-GFP]*. The  
192 mechanosensory neurons, AVM, ALM, and PLM, were visualized using the expression of the  
193 transgene *zdl5[Pmec-4::GFP]*. Synchronized worms were obtained by allowing eggs to hatch  
194 overnight in M9 buffer without food. The larval stage was determined by using differential  
195 interference contrast (DIC) microscopy to examine the gonad cell number and the gonad size.  
196 Staged larvae were mounted on a 5% agarose pad with 10 mM levamisole buffer. Images were  
197 taken using epifluorescent microscopy with a Zeiss 63X water immersion objective.

198

199 The number of processes during early L1 larval stage was scored by counting the number of  
200 processes that extended for a distance greater than the length of one cell body. We report  
201 instances in which there were no such processes, one process or more than one processes. In  
202 the L2 larval stage, a single early process was scored if there was only one major extension  
203 from the ventral leading edge. The HSN cell body in L2 stage larvae was scored as dorsal if the

204 cell body had failed to migrate ventrally and was not positioned near the PLM axon. In L4 stage  
205 larvae, a multiple ventral processes phenotype was scored if more than one major extension  
206 protruded from the ventral side of cell body.

207

208 Extension into the nerve ring was scored as defective if the axon did not extend further than  
209 approximately half the width of the nerve ring. Anterior extension was scored as defective if  
210 the axon did not extend further anteriorly than the nerve ring. PLM axons are scored as over-  
211 extending if they extended further anterior than the position of the ALM cell body.

212

### 213 **Analysis of the direction of HSN outgrowth**

214 HSN was visualized using the transgene *kyIs262[unc-86::myr-GFP]*. L4 stage larvae were  
215 mounted on a 5% agarose pad with 10 mM levamisole buffer. An anterior protrusion was  
216 scored if the axon extended from the anterior side of the cell body for a distance greater than  
217 the length of three cell bodies. A dorsal or posterior protrusion was scored if the axon extended  
218 dorsally or posteriorly for a distance greater than two cell body lengths. HSN was considered  
219 multipolar if more than one process extended a length greater than one cell body. Images were  
220 taken using epifluorescent microscopy with a Zeiss 40X objective.

221

### 222 **Analysis of the UNC-40::GFP localization in L2 stage animal**

223 For analysis of UNC-40::GFP localization, L2 stage larvae with the transgenic marker  
224 *kyEx1212[unc-86::unc-40::GFP; odr-1::dsRed]* were mounted on a 5% agarose pad with 10 mM  
225 levamisole buffer. Staging was determined by examining the gonad cell number and the gonad  
226 size under differential interference contrast (DIC) microscopy. Images were taken using  
227 epifluorescent microscopy with a Zeiss 63X water immersion objective. The UNC-40::GFP

228 localization was determined by measuring the average intensity under lines drawn along the  
229 dorsal and ventral edges of each HSN cell body by using ImageJ software. For analysis of the  
230 anterior–posterior orientation of UNC-40::GFP, the dorsal segment was geometrically divided  
231 into three equal lengths (dorsal anterior, dorsal central and dorsal posterior segments). The  
232 line-scan intensity plots of each of these segments were recorded. ANOVA test was used to  
233 determine if there is a significant difference between intensities of the three segments. The  
234 dorsal distribution was considered uniform if  $p \geq 0.05$  and was considered asymmetrical if  
235  $p \leq 0.05$ . Within an asymmetric population, the highest percent intensity was considered to  
236 localize UNC-40::GFP to either anterior, posterior or central domain of the dorsal surface.

237

## 238 **Computations**

239 A program to simulate a two-dimensional lattice random walk based on the probability of  
240 dorsal, ventral, anterior, and posterior outgrowth for a mutant (Table 1) was created using  
241 MATLAB. (The directions of the axons from multipolar neurons were not scored. These axons  
242 appear to behave in the same manner as the axons from monopolar neurons, but this has not  
243 yet been tested.) The probability of dorsal, ventral, anterior, or posterior outgrowth was  
244 assigned for the direction of each step of a random walk moving up, down, left or right,  
245 respectively. Each variable is considered independent and identically distributed. Simulations  
246 of 500 equal size steps (size =1) were plotted for 50 tracks (Figure 1B, 5B and 6B inserts). A  
247 Gaussian distribution for the final positions of the tracks was generated using Matlab's random  
248 function (Figure 6).

249

250 The mean squared displacement (MSD) is used to provide a quantitative characteristic of the

251 motion that would be created by the outgrowth activity undergoing the random walk. Using  
252 the random walks generated for a mutant the MSD can be calculated:

$$253 \quad msd(\tau) = \langle [r(t + \tau) - r(t)]^2 \rangle$$

254 Here,  $r(t)$  is the position at time  $t$  and  $\tau$  is the lag time between two positions used to calculate  
255 the displacement,  $\Delta r(\tau) = r(t+\tau) - r(t)$ . The time-average over  $t$  and the ensemble-average over  
256 the 50 trajectories were calculated. This yields the MSD as a function of the lag time. A  
257 coefficient giving the relative rate of diffusion was derived from a linear fit of the curve. The  
258 first two lag time points were not considered, as the paths often approximate a straight line at  
259 short intervals.

## 260 **Results**

### 261 **UNC-5 regulates the pattern of outgrowth from the HSN neuron**

262 To investigate whether UNC-5 activity can regulate the length or number of processes that a  
263 neuron can develop when outgrowth is towards an UNC-6 source, we examined the  
264 development of the HSN axon in *unc-5* mutations. The HSN neuron sends a single axon to the  
265 ventral nerve cord, which is a source of the UNC-6 cue (WADSWORTH *et al.* 1996; ADLER *et al.*  
266 2006; ASAKURA *et al.* 2007). Axon formation is dynamic (ADLER *et al.* 2006). Shortly after  
267 hatching, HSN extends short neurites in different directions. These neurites, which dynamically  
268 extend and retract filopodia, become restricted to the ventral side of the neuron where a  
269 leading edge forms. Multiple neurites extend from this surface until one develops into a single  
270 axon extending to the ventral nerve cord. Measurements of growth cone size, maximal length,  
271 and duration of growth cone filopodia indicate that UNC-6, UNC-40, and UNC-5 control the  
272 dynamics of protrusion (NORRIS AND LUNDQUIST 2011).

273

274 We observe that in *unc-5* mutants, the patterns of extension are altered. In wild-type animals at the  
275 L1 stage of development most HSN neurons extends more than one short neurite, however in *unc-*  
276 *5(e53)* mutants nearly half the neurons do not extend a process (Figures 3A and 3B). During the L2  
277 stage in wild-type animals a prominent ventral leading edge forms and the cell body undergoes a  
278 short ventral migration that is completed by the L3 stage. By comparison, in *unc-5* mutants the cell  
279 body may fail to migrate and instead a single large ventral process may form early during the L2  
280 stage (Figures 3A, 3C and 3E). It may be that the ventral migration of the HSN cell body requires the  
281 development of a large leading edge with multiple extensions. Together the observations indicate  
282 that loss of *unc-5* function affects the patterning of outgrowth, *i.e.* the timing, length, and number of  
283 extensions that form. Loss of *unc-5* function does not prevent movement, in fact, a single large

284 ventral extension can form in the mutant at a time that is even earlier than when a single ventral  
285 extension can be observed in wildtype.

286

287 We tested four different *unc-5* alleles in these experiments. The *unc-5(e53)* allele is a putative  
288 molecular null allele, *unc-5(ev480)* is predicted to truncate UNC-5 after the cytoplasmic ZU-5  
289 domain and before the Death Domain, *unc-5(e152)* is predicted to truncate UNC-5 before the  
290 ZU-5 domain and Death Domain, and *unc-5(ev585)* is a missense allele that affects a predicted  
291 disulfide bond in the extracellular Ig(C) domain (KILLEEN *et al.* 2002). Although both the *unc-*  
292 *5(ev480)* and *unc-5(e152)* are predicted to cause premature termination of protein translation  
293 in the cytodomain, the *unc-5(e152)* product retains the signaling activity that prevents these  
294 phenotypes. Based on other phenotypes, previous studies reported that the *unc-5(e152)* allele  
295 retains UNC-40-dependent signaling functions (MERZ *et al.* 2001; KILLEEN *et al.* 2002).

296

### 297 **UNC-5 is required for the induction of multiple HSN axons by UNC-6 $\Delta$ C and a *mig-15*** 298 **mutation**

299 The results above suggest that UNC-5 activity can regulate the number of HSN extensions that  
300 form. To further test this hypothesis, we checked whether loss of UNC-5 function can suppress  
301 the development of additional processes that can be induced. Previously we reported that  
302 expression of the N-terminal fragment of UNC-6, UNC-6 $\Delta$ C, induces excessive branching of  
303 ventral nerve cord motor neurons and that UNC-5 can suppress this branching (LIM *et al.* 1999).  
304 We now report that HSN develops an extra process in response to UNC-6 $\Delta$ C and that UNC-5  
305 suppresses the development of this extra process (Figures 3D and 3F).

306

307 To investigate whether this UNC-5 activity might involve known effectors of asymmetric neuronal  
308 outgrowth, we tested for genetic interactions between *unc-5* and both *mig-10* and *mig-15*. MIG-10  
309 (lamellipodin) is a cytoplasmic adaptor protein that can act cell-autonomously to promote UNC-40-  
310 mediated asymmetric outgrowth (ADLER *et al.* 2006; CHANG *et al.* 2006; QUINN *et al.* 2006; QUINN  
311 *et al.* 2008; MCSHEA *et al.* 2013). MIG-15 (NIK kinase) is a cytoplasmic protein and evidence  
312 indicates that *mig-15* functions cell-autonomously to mediate a response to UNC-6 (POINAT *et al.*  
313 2002; TEULIÈRE *et al.* 2011). It's proposed that *mig-15* acts with *unc-5* to polarize the growth cone's  
314 response and that it controls the asymmetric localization of MIG-10 and UNC-40 (TEULIÈRE *et al.*  
315 2011; YANG *et al.* 2014). We previously noted that HSN neurons often become bipolar in *mig-15*  
316 mutants and frequently UNC-40::GFP is localized to multiple surfaces in a single neuron, suggesting  
317 that loss of MIG-15 enhances the ability of UNC-40::GFP to cluster (YANG *et al.* 2014). In our  
318 experiments we used the *mig-10* (*ct141*) loss-of-function allele (MANSER AND WOOD 1990; MANSER  
319 *et al.* 1997) and the *mig-15*(*rh148*) allele, which causes a missense mutation in the ATP-binding  
320 pocket of the kinase domain and is a weak allele of *mig-15* (SHAKIR *et al.* 2006; CHAPMAN *et al.*  
321 2008).

322

323 We find that the extra processes induced by UNC-6ΔC expression are suppressed by *mig-*  
324 *10*(*ct141*) (Figures 3F). We also find that the *mig-15* mutation causes extra HSN processes and  
325 that the loss of UNC-5 function suppresses these extra HSN processes (Figures 3F and 3G).  
326 These results support the hypothesis that the ability of UNC-5 to regulate the development of  
327 multiple protrusions involves the molecular machinery that controls UNC-40-mediated  
328 asymmetric neuronal outgrowth.

329

330 **UNC-5 is required for PLM overextension**



331 The SOAL model predicts that the ability of UNC-5 to regulate the length and number of neural  
332 protrusions is independent of the direction of outgrowth. HSN sends a single axon ventrally, while  
333 PLM sends an axon anteriorly from a posteriorly positioned cell body. The HSN axon travels  
334 towards UNC-6 sources, whereas the PLM axon pathway is perpendicular to UNC-6 sources. To  
335 investigate whether UNC-5 activity can regulate the length or number of processes that develop  
336 perpendicular to UNC-6 sources we examined the development of the PLM axon. We also chose  
337 PLM because UNC-5 is already known to affect the length of the PLM axon. It was previously  
338 reported that in *rpm-1* mutants the PLM axon will overextend in the anterior direction and that  
339 this phenotype can be suppressed by *sax-3* and *unc-5* loss-of-function mutations (Li *et al.* 2008).  
340 In *rpm-1* loss-of-function mutations there is an increase in the level of UNC-5::GFP expression,  
341 suggesting that the level of UNC-5 within PLM is important for controlling overextension.  
342 However, the overextension in the *rpm-1* mutant is not suppressed by a loss-of-function *unc-40*  
343 mutation (Li *et al.* 2008), suggesting that the overextension does not involve UNC-40 SOAL, but  
344 rather another outgrowth activity that is nonUNC-40-mediated.

345

346 Given that UNC-5 activity is involved in the overextension of the PLM axon, and that the *mig-15*  
347 mutation affects HSN outgrowth in an UNC-40 dependent fashion, we decided to test whether  
348 PLM overextension might be induced by the *mig-15* mutation in an UNC-40-dependent fashion.  
349 The HSN results suggest that altering *mig-15* function creates a sensitized genetic background.  
350 That is, the *unc-5(ev480)* mutation suppresses HSN outgrowth extension in both the wild-type  
351 and *mig-15(rh148)* backgrounds, but the *mig-15* mutation creates a stronger patterning  
352 phenotype. This idea is supported by the evidence that the *mig-15* mutation enhances the  
353 ability of UNC-40 to localize at surfaces (YANG *et al.* 2014).

354

355 We find that in *mig-15(rh148)* mutants the PLM axon often fails to terminate at its normal  
356 position and instead extends beyond the ALM cell body. This overextension is suppressed in  
357 *unc-5(e53);mig-15(rh148)* and *unc-40(e1430);mig-15(rh148)* mutants (Figures 4A and 4B).  
358 The results are consistent with the idea that UNC-5 is required for the UNC-40-mediated  
359 outgrowth activity that causes overextension in *mig-15(rh148)* mutants.

360

### 361 **UNC-5 is required for ALM and AVM branching and extension**

362 We also investigated the effect of UNC-5 activity on patterning where sources of UNC-6 and  
363 other cues are in a more complex arrangement. Specifically, we examined whether UNC-5 plays  
364 a role in the outgrowth of AVM and ALM processes at the nerve ring. During larval  
365 development, processes from the AVM neuron and the two ALM neurons (one on each side of  
366 the animal) migrate anteriorly to the nerve ring at dorsal and ventral positions respectively  
367 (Figure 4C). At the nerve ring each axon branches; one branch extends further anteriorly and the  
368 other extends into the nerve ring. Evidence suggests that at the midbody of the animal the  
369 positioning of these axons along the dorsal-ventral axis requires UNC-6, UNC-40, and UNC-5  
370 activity. In *unc-6*, *unc-40*, and *unc-5* null mutants, or when the UNC-6 expression pattern is altered,  
371 the longitudinal nerves are mispositioned (REN *et al.* 1999). Glia cells and neurons at the nerve ring  
372 are sources of UNC-6 (WADSWORTH *et al.* 1996). The guidance of some axons in the nerve ring are  
373 disrupted in *unc-6* and *unc-40* mutants (HAO *et al.* 2001; YOSHIMURA *et al.* 2008). The precise  
374 spatial and temporal arrangement of the UNC-6 cue in relationship to the position of the  
375 migrating growth cones is not fully understood. Nevertheless, the anteriorly migrating growth  
376 cones appear to use the UNC-6 cue from the ventral sources to help maintain the correct dorsal-  
377 ventral position, even while moving towards the nerve ring, which is a new source of UNC-6  
378 that is perpendicular to the ventral source. At the nerve ring the axons branch. One process

379 continues anteriorly, moving past the new UNC-6 source, whereas the other projects at a right  
380 angle and moves parallel to the new source.

381

382 We find genetic interactions involving *unc-5*, *unc-40*, and *mig-15* that affect outgrowth  
383 patterning of the ALM and AVM extensions at the nerve ring (Figures 4C, 4D, and 4E). In *mig-*  
384 *15(rh148);unc-5(e53)* mutants, the AVM axon often fails to extend anteriorly from the branch  
385 point and only extends into the nerve ring, or it fails to extend into the nerve ring and only  
386 extends anteriorly, or it fails to do both and terminates at this point. In *unc-40(e1430)* mutants,  
387 the axon often fails to branch into the nerve ring, although it extends anteriorly. In comparison,  
388 in *unc-40(e1430);mig-15(rh148)* mutants more axons extend into the nerve ring. These results  
389 suggest that UNC-5 helps regulate UNC-40-mediated outgrowth to pattern the outgrowth at the  
390 nerve ring.

391

### 392 **Interactions between *unc-5* and other genes affect the probability of HSN extension in** 393 **each direction**

394 We hypothesize that there are interactions between *unc-5* and other genes that control the  
395 degree to which the direction of outgrowth fluctuates. In the SOAL model, the collective effect  
396 of all the cues that promote and inhibit outgrowth set a probability of outgrowth at each  
397 surface at each instance of time. As the direction of outgrowth fluctuates over time, a bias is  
398 created that determines directionality. Since the direction of outgrowth is stochastically  
399 determined, gene activity is not inherently associated with movement in a specific direction.  
400 This model differs from the attraction and repulsion model where gene activity is assayed  
401 based on direction, *i.e.* the direction of movement relative to the source of a cue. The attraction  
402 and repulsion model places genes into attractive or repulsive pathways. We hypothesize that

403 *unc-5* and other genes might instead be ordered into pathways based on how they affect the  
404 fluctuation of outgrowth activity.

405

406 Probability distributions for the direction of outgrowth are used to study how genes affect the  
407 fluctuation of outgrowth activity. By comparing the distributions created from wild-type and  
408 mutant animals, the relative effect that genes have on the fluctuation can be determined. To  
409 accomplish this, the direction that the HSN axon initially projects from the cell body is scored  
410 (Figure 5A). We reason that the initial development of an axon is the result of the collective  
411 impact of all the individual outgrowth movements that take place during the initial formation of  
412 the axon. In wildtype, there is a high probability for outgrowth in the ventral direction at each  
413 instance of time. As such, there is little fluctuation over time and a strong bias for ventrally  
414 directed outgrowth is created. A mutation can cause a lower probability of outgrowth in the  
415 ventral direction and a higher probability for outgrowth in other directions. This creates  
416 greater fluctuation over time and a weaker bias of ventrally directed outgrowth. For this assay,  
417 all the outgrowth movement during the initial axon extension is treated as a single event, *i.e.* the  
418 movement of the membrane occurs in a single step from the cell body to a position that is at a  
419 set length from the cell body (see Materials and Methods). This step is in the anterior,  
420 posterior, dorsal, or ventral direction. Thus, direction is the random variable which takes a  
421 value of anterior, posterior, dorsal, or ventral. We can determine the probability of occurrence  
422 for each value by scoring many individual animals for each strain.

423

424 Using this assay, we tested for genetic interactions between *unc-5* and four other genes; *elg-20*,  
425 *sax-3*, *madd-2*, or *unc-6*. We have chosen these particular genes because previous observations  
426 suggest interactions. 1) EGL-20 (Wnt) is a secreted cue expressed from posterior sources (PAN

427 *et al.* 2006) and it affects to which surface of the HSN neuron the UNC-40 receptor localizes and  
428 mediates outgrowth (KULKARNI *et al.* 2013). Based on a directional phenotype, a synergistic  
429 interaction between *unc-5* and *egl-20* has been observed. In either *unc-5* or *egl-20* mutants the  
430 ventral extension of AVM and PVM axons is only slightly impaired, whereas in the double  
431 mutants there is much greater penetrance (LEVY-STRUMPF AND CULOTTI 2014). 2) SAX-3(Robo) is  
432 a receptor that regulates axon guidance and is required for the asymmetric localization of UNC-  
433 40 in HSN (TANG AND WADSWORTH 2014). Based on a directional phenotype, SAX-3 and UNC-40  
434 appear to act in parallel to guide the HSN towards the ventral nerve cord (XU *et al.* 2015). 3)  
435 MADD-2 is a cytoplasmic protein of the tripartite motif (TRIM) family that potentiates UNC-40  
436 activity in response to UNC-6 (ALEXANDER *et al.* 2009; ALEXANDER *et al.* 2010; HAO *et al.* 2010;  
437 MORIKAWA *et al.* 2011; SONG *et al.* 2011; WANG *et al.* 2014). MADD-2::GFP and F-actin colocalize  
438 with UNC-40::GFP clusters in the anchor cell (WANG *et al.* 2014). 4) Of course, UNC-6 is an UNC-  
439 5 ligand. DCC (UNC-40) and UNC5 (UNC-5) are thought to act independently or in a complex to  
440 mediate responses to netrin (UNC-6) (COLAVITA AND CULOTTI 1998; HONG *et al.* 1999; MACNEIL *et*  
441 *al.* 2009; LAI WING SUN *et al.* 2011).

442

443 In a test for interaction with *egl-20*, we find that in comparison to *unc-5(e53)* or *egl-20(n585)*  
444 mutants, the *unc-5(e53);egl-20(n585)* double mutant have a lower probability for ventral  
445 outgrowth and higher probability for outgrowth in other directions (Table 1). This suggests  
446 that *unc-5* and *egl-20* may act in parallel to achieve the highest probability for HSN ventral  
447 outgrowth, *i.e.* they act to prevent UNC-40-mediated outgrowth from fluctuating in other  
448 directions.

449

450 In a test for interaction with *sax-3*, we find that the probability of outgrowth in each direction in  
451 *unc-5(e53);sax-3(ky200)* mutants is similar to the probabilities in *sax-3(ky200)* or *sax-3(ky123)*  
452 mutants (Table 1). Given the results with *unc-5* and *egl-20*, we further tested the probability of  
453 outgrowth in each direction in *egl-20(n585);sax-3(ky123)* mutants. We find that it is similar to  
454 the probabilities in *sax-3(ky200)* or *sax-3(ky123)* mutants (Table 1). The *sax-3(ky123)* allele  
455 results in a deletion of the signal sequence and first exon of the gene, whereas *sax-3(ky200)*  
456 contains a missense mutation which is thought to cause protein misfolding and mislocalization  
457 at the restrictive temperature (25°C) (ZALLEN *et al.* 1998; WANG *et al.* 2013). The *egl-*  
458 *20(n585);sax-3(ky123)* mutants do not grow well and so it is easier to use the temperature sensitive  
459 *sax-3* allele. Together, the results suggest that *sax-3* may be required for both the *unc-5-* and the  
460 *egl-20*-mediated activities that allow the highest probability for HSN ventral outgrowth.

461

462 In a test for interaction with *madd-2*, we find that the probability of outgrowth in each direction in  
463 *unc-5(e53);madd-2(tr103)* mutants is similar to the probabilities in *madd-2(tr103)* mutants (Table 1).  
464 There is a higher probability for anterior HSN outgrowth, similar to what is observed in *unc-*  
465 *40(e1430)* mutants. These results suggest that *madd-2* might be required for the *unc-40*  
466 outgrowth activity. The probability of outgrowth in each direction in *madd-2(tr103);sax-*  
467 *3(ky123)* mutants is similar to the probabilities in *sax-3(ky200)* or *sax-3(ky123)* mutants (Table  
468 1). The *madd-2(tr103)* allele appears to act as a genetic null (ALEXANDER *et al.* 2010).

469

470 In a test for interaction with *unc-6*, we find that the probability of outgrowth in each direction  
471 in *unc-5(e53);unc-6(ev400)* and *unc-40(e1430);unc-5(e53)* mutants is similar to the probabilities  
472 in *unc-6(ev400)* mutants insofar as there is a lower probability for ventral outgrowth and a  
473 higher probability for anterior outgrowth (Table 1). However, the probabilities in each

474 direction are closer to those obtained from the *unc-40(e1430)* mutants because the probability  
475 of anterior outgrowth is lower in these mutants than in *unc-6* mutants. This suggest that UNC-5  
476 and UNC-40 might help increase the probability of anterior outgrowth in the absence of UNC-6.

477

478 Taken together, these results support the hypothesis that there are genetic interactions that  
479 regulate the degree to which the direction of outgrowth fluctuates. Rather than defining the  
480 function of a gene by its ability to control a deterministic event, *i.e.* outgrowth in one direction,  
481 gene function can be defined by its ability to control a stochastic process, *i.e.* the probability of  
482 outgrowth in different directions.

483

484 ***unc-5* is a member of a class of genes that has a similar effect on the spatial extent of movement**

485 How does *unc-5* affect outgrowth movement? The results above show that *unc-5* and its  
486 interactions with other genes affect the degree to which the direction of outgrowth fluctuates.  
487 The degree of fluctuation differs depending on the genes involved. The SOAL model predicts  
488 that these differences alter the extent of outgrowth; the more the direction of movement  
489 fluctuates, the shorter the distance of travel is in a given amount of time.

490

491 To depict how *unc-5* and other genes differentially regulate outgrowth movement, we use  
492 random walk modeling. Random walks describe movement that occurs as a series of steps in  
493 which the angles and the distances between each step is decided according to some probability  
494 distribution. By using the probability distribution obtained from a mutant for each step of a  
495 random walk, and by keeping the distance of each step equal, a random walk can be  
496 constructed (Figure 5A). In effect, this method applies the probability distribution to discrete

497 particles having idealized random walk movement on a lattice. By plotting random walks  
498 derived from wild-type animals and different mutants, the relative effect that mutations have  
499 on random walk movement can be visualized. For example, Figure 5B shows 50 tracks of 500  
500 steps for wildtype and two mutants (mutant A is *unc-5(e53)* and mutant B is *egl-20(n585);sax-*  
501 *3(ky123)*). This reveals the effect that a mutation has on the displacement of movement. After  
502 500 steps the displacement from the origin (0,0) is on average less for mutant A than for  
503 wildtype, and less for mutant B than for wildtype or mutant A.

504

505 The random walk models show the relative effect that a mutation has on a property of  
506 outgrowth movement. It is worth noting that this is not modeling the actual trajectory of  
507 migrating axons. Neuronal outgrowth is essentially a mass transport process in which mass  
508 (the molecular species of the membrane) is sustained at the leading edge and moves outward.  
509 Our assay compares the effect that different mutations would have on the movement of mass at  
510 the leading edge of an extension if the conditions of the system were kept constant. Of course,  
511 *in vivo* the conditions are not constant. For one, as an extension moves it will encounter new  
512 environments where the cues may be new or at different concentrations, all of which affect the  
513 probability distribution. The actual patterns of outgrowth observed are the result of all the  
514 probabilities for outgrowth that occur at each instance of time. It has recently been suggested  
515 that our description might be more accurately described as neuro-percolation, a superposition  
516 of random-walks (AIELLO 2016).

517

518 Our random walk analysis compares the effect that different mutations have on the properties  
519 of movement. In wild-type animals, there is a high probability for outgrowth in the ventral  
520 direction. The analysis shows that conditions in wildtype create nearly straight-line movement,



521 *i.e.* if the same random walk is repeatedly done for the same number of steps, starting at the  
522 same origin, the final position of the walk along the x axis does not vary a great amount. In  
523 comparison, we find that a mutation can create random walk movement in which the final  
524 position is more varied. This variation occurs because the mutation increases the probability of  
525 outgrowth in other directions. For each mutation, we simulate 50 random walks of 500 steps  
526 and derive the mean and standard deviation of the final position along the X-axis. To compare  
527 strains, we plot the normal distribution, setting the mean at the same value for each. The  
528 difference between the curve for a mutant and wildtype shows the degree to which the  
529 mutation caused the direction of outgrowth to fluctuate (Figure 5C).

530

531 The results reveal four different distribution patterns (Figure 6). The first class is the wild-type  
532 distribution, which has the distribution curve with the highest peak. The second class  
533 comprises *unc-5*, *egl-20*, *unc-53*, and *unc-6* in which the distribution curve is flatter than the  
534 wild-type curve. We included *unc-53* because our previous study showed that it has genetic  
535 interactions with *unc-5* and *unc-6* (KULKARNI *et al.* 2013). The *unc-53* gene encodes a  
536 cytoskeletal regulator related to the mammalian NAV proteins and *unc-53* mutations cause  
537 guidance defects (MAES *et al.* 2002; STRINGHAM *et al.* 2002; STRINGHAM AND SCHMIDT 2009). The  
538 third class has a distribution curve which is flatter than the second and comprises *sax-3*, *mig-15*,  
539 and several double mutation combinations (Figure 6). The fourth class has the flattest  
540 distribution curve and comprises *egl-20;sax-3*, *unc-40;sax-3*, and *unc-53;sax-3;unc-6*. This class  
541 indicates the greatest degree of fluctuation. The ability to cause the direction of movement to  
542 fluctuate is not associated with a specific direction of HSN movement. For example, *unc-5;sax-3*,  
543 *unc-53;unc-6*, *unc-40;egl-20*, and *madd-2;sax-3* each show a widely dispersed pattern, but the  
544 direction is ventral, dorsal, anterior, and posterior, respectively (Figure 6).

545

546 The distribution patterns indicate that genes have different effects on the extent that outgrowth  
547 movement can travel through the environment. Mean squared displacement (MSD) is a  
548 measure of the spatial extent of random motion. The MSD can be calculated from the random  
549 walk data. Plotting MSD as a function of the time interval shows how much an object displaces,  
550 on average, in a given interval of time, squared (Figure 7A). For normal molecular diffusion, the  
551 slope of the MSD curve is directly related to the diffusion coefficient. In cell migration models  
552 this value is referred to as the random motility coefficient. Coefficients are experimentally  
553 determined; they describe how long it takes a particular substance to move through a  
554 particular medium. We determine this value in order to numerically and graphically compare  
555 how mutations can alter displacement relative to wildtype (Figure 7B). The four classes of  
556 genes are apparent by comparing the height of the bars in Figure 7B.

557

558 The results of this modeling suggest that the activities of certain genes, and combinations of  
559 genes, have distinct effects on the rate of outgrowth movement. In theory, these differences  
560 could be an important means by which genes cause different outgrowth patterns.

561

562 ***unc-5* and other genes regulate UNC-40 receptor clustering, which is a consequence of the**  
563 **SOAL process**

564 How does *unc-5* affect the localization of the UNC-40 receptor and how does this localization  
565 affect UNC-40-mediated outgrowth activity and the pattern of outgrowth? Beginning in the  
566 early L2 stage, UNC-40::GFP becomes localized to the ventral side of HSN in wildtype (ADLER *et*  
567 *al.* 2006; KULKARNI *et al.* 2013). Reflecting the dynamic morphological changes that occur as the  
568 HSN axon forms, the site of asymmetric UNC-40::GFP localization alternates in the neurites and

569 along the ventral surface of the neuron (KULKARNI *et al.* 2013). Dynamic UNC-40::GFP  
570 localization patterns have also been reported for the anchor cell, in which UNC-40 and UNC-6  
571 are also key regulators of extension (ZIEL *et al.* 2009; HAGEDORN *et al.* 2013). Live imaging of the  
572 anchor cell reveals that UNC-40::GFP “clusters” form, disassemble, and reform along the  
573 membrane (WANG *et al.* 2014). However, live imaging can’t directly ascertain whether the  
574 position of a cluster is randomly determined since a movement event cannot be repeatedly  
575 observed to determine a probability distribution. Mathematical modeling of cluster movement  
576 as a stochastic process has not been done. Nevertheless, the results are consistent with the fact  
577 that a probability distribution for the direction of UNC-40-mediated HSN outgrowth movement  
578 can be determined and, therefore, the UNC-40 localization that gives rise to the outgrowth  
579 activity can be defined as a stochastic process.

580

581 The UNC-40::GFP clustering phenomena raises questions about the relationship between  
582 robust UNC-40 clustering (*i.e.*, sites of distinct UNC-40 localization observable by UNC-40::GFP)  
583 and UNC-40-mediated outgrowth activity. Two models are presented in Figure 8. In the first  
584 model, the SOAL mechanism causes UNC-40 clustering, which is required for UNC-40-mediated  
585 outgrowth activity (Figure 8A). In the second model, SOAL and outgrowth activities are  
586 independent and can happen concurrently (Figure 8B). In the first model, the output of the  
587 SOAL process is receptor clustering. This is next followed by outgrowth activity from the  
588 locations at the membrane where the clusters become stable. This model renders UNC-40-  
589 mediated outgrowth a deterministic event occurring at the macro-scale. In the second model,  
590 the SOAL process and outgrowth activity are concurrent activities which can occur  
591 stochastically along the membrane at the micro-scale. UNC-40 clustering in this model might be  
592 an observable consequence of the micro-scale stochastic process that arises over time.

593

594 The models make specific predictions that can be tested. In the first model, UNC-40-mediated  
595 outgrowth will not happen if UNC-40 does not cluster. In the second model, the loss of UNC-40  
596 clustering does not lead to a loss of UNC-40-mediated outgrowth. We favor the second model.  
597 In the *sax-3* mutant there is a large fluctuation in the direction of outgrowth; it is in the third  
598 class of mutants (Figures 6 and 7). We previously reported that *sax-3* is required for robust  
599 UNC-40::GFP asymmetric localization; in *sax-3* mutants UNC-40::GFP remains uniformly  
600 dispersed around the periphery of HSN ((TANG AND WADSWORTH 2014) and Figure 9). Whereas  
601 in the *sax-3* mutant there is a ventral bias for outgrowth, in the *unc-40;sax-3* mutant there is not  
602 (Figure 6). This suggests that in the *sax-3* mutant there is UNC-40-mediated outgrowth activity  
603 that helps create a ventral bias. This is consistent with the second model because UNC-40-  
604 mediated outgrowth activity is occurring even when robust UNC-40::GFP is not observed.

605

606 We hypothesize that a consequence of the micro-scale SOAL process over time is macro-scale  
607 UNC-40 clustering. If so, then *unc-5* activity should affect UNC-40::GFP clustering because it  
608 affects the degree to which the direction of UNC-40 receptor localization fluctuates. However,  
609 even though there is a higher probability that localization occurs at surfaces other than at the  
610 ventral surface, we observe robust asymmetrically localized UNC-40::GFP clustering in *unc-*  
611 *5(e53)* mutants (KULKARNI *et al.* 2013). We speculate that *unc-5(e53)*, as well as other gene  
612 mutations, do not cause the direction of UNC-40 localization to fluctuate enough to prevent  
613 observable UNC-40::GFP clustering. We decided to examine UNC-40::GFP clustering in double  
614 mutants to see whether there is an additive effect. In double mutants will the direction of UNC-  
615 40 localization fluctuate enough so that UNC-40::GFP clustering cannot be observed in our  
616 assay?

617

618 We made double mutant combinations between *unc-5*, and *egl-20* or *unc-53*. In *egl-20* and *unc-*  
619 *53* single mutants there is fluctuation in the direction of outgrowth (Figures 6 and 7) and  
620 robust asymmetrical UNC-40::GFP localization (Figure 9, *unc-53* results were previously  
621 reported (KULKARNI *et al.* 2013)). In comparison to the single mutants, the double mutants all  
622 show an increase in the degree to which the direction of outgrowth fluctuates (Figures 6 and 7).  
623 Further, in contrast to the single mutants, UNC-40::GFP remains uniformly dispersed around  
624 the periphery of HSN in the double mutants (Figure 9). The results suggest a correlation  
625 between the degree to which UNC-40-mediated outgrowth activity fluctuates and the ability to  
626 detect UNC-40::GFP clustering. This is consistent with the second model (Figure 8). We also  
627 observe that in *madd-2(tr103)* mutants the direction of outgrowth fluctuates (Table 1), but  
628 unlike *egl-20* and *unc-53* single mutants, there is not robust asymmetrical UNC-40::GFP  
629 localization and UNC-40::GFP remains uniformly dispersed (Figure 9). The double mutants,  
630 *unc-5;madd-2*, are similar to the single *madd-2* mutant. Similar results are observed with *sax-3*  
631 and *unc-5;sax-3* mutants (Figure 9). We hypothesize that in the *madd-2* and *sax-3* mutations the  
632 degree to which the direction of UNC-40 localization fluctuates is so great that the *unc-5*  
633 mutation makes no difference on the UNC-40::GFP clustering phenotype.

634

635 We suggest these results support our model in which UNC-40-mediated outgrowth is an  
636 independent process that is coupled to the SOAL process in the HSN neuron. Previously we  
637 hypothesized that UNC-40 SOAL is a general cellular process that polarizes and orients cellular  
638 activities to the surrounding environment (YANG *et al.* 2014). In neurons during the  
639 development of axons, UNC-40 SOAL is coupled to the outgrowth machinery. However, UNC-40  
640 SOAL may also become coupled to other cellular activities. For example, UNC-6, UNC-5, and

641 UNC-40 are also known to play a role in localizing synapses in neurons (COLON-RAMOS *et al.*  
642 2007; POON *et al.* 2008; KILLEEN 2009).

643

## 644 **Discussion**

645 In this paper, we show that UNC-5 regulates the number and length of neuronal processes that  
646 a neuron can develop. We observe that *unc-5* loss-of-function mutations inhibit the  
647 development of multiple neurites during early outgrowth from HSN. They also suppress the  
648 development of extra HSN processes that are induced by a *mig-15* mutation or by expression of  
649 the N-terminal fragment of UNC-6. We also observe that *unc-5* mutations suppress the anterior  
650 overextension of the PLM axon that occurs in the *mig-15* mutant. Finally, in combination with  
651 the *mig-15* mutation, *unc-5* loss-of-function mutations affect the branching and extension of  
652 ALM and AVM axons at the nerve ring. In each of these cases, the pattern of outgrowth is  
653 altered by loss of UNC-5 function. We further show that UNC-5 acts together with UNC-6, EGL-  
654 20, SAX-3, UNC-53, MIG-15, and MADD-2 to regulate UNC-40 asymmetric localization at a  
655 surface of HSN. Here we discuss a model to explain how UNC-5 could control patterns of  
656 outgrowth by regulating UNC-40 stochastically orientated asymmetric localization (SOAL).

657

### 658 **UNC-40 SOAL; a model to explain *unc-5* phenotypes**

659 We hypothesize that UNC-40 undergoes stochastically orientated asymmetric localization  
660 (SOAL) within neurons. Because this is a stochastic process, there is a probability of UNC-40  
661 localizing and mediating outgrowth at each surface of the neuron. The probability of outgrowth  
662 at each point along a surface may vary. This means that at one instance of time there is a  
663 probability that UNC-40-mediated outgrowth will occur in a specific direction from a point  
664 along the surface of the neuron. At the next instance of time there is a probability that

665 outgrowth will not occur at this point, but will instead occur at another point and in a different  
666 direction. When considered over time, the direction of outgrowth fluctuates. This type of  
667 movement can be modeled as a random walk, and random walks predict that the displacement  
668 of the membrane will depend on the degree to which the direction of outgrowth movement  
669 fluctuates. Extracellular cues, and the neuron's response to these cues, set the probability of  
670 outgrowth happening at each point along the surface and therefore regulate the amount of  
671 fluctuation. The process occurs at the micro-scale and it controls the direction and rate of  
672 outgrowth movement. Below we describe how this model can explain the patterns of  
673 outgrowth extension seen in the *unc-5* mutants.

674

675 Figure 2 depicts the essential concepts underlying the explanations. The same depiction is used  
676 to explain the mutant phenotypes in Figures 10-15. Four important concepts are presented by  
677 these figures. (1) There are numerous extracellular cues acting on the neuron to set the  
678 probability of outgrowth in each direction. These cues include secreted molecules, such as  
679 UNC-6 and EGL-20, as well as many other cues, such as extracellular matrix components (YANG  
680 *et al.* 2014). For movement in the anterior and posterior directions, the neuron's response to  
681 the cues sets an equal probability for movement in the dorsal and ventral direction. For  
682 movement in the dorsal and ventral directions, the neuron's response to the cues sets an equal  
683 probability for movement in the anterior and posterior direction. These cues are depicted in  
684 the figures as purple, blue, orange, and red color gradients. (2) Besides UNC-40-mediated  
685 outgrowth activity, cues also set the probability of nonUNC-40-mediated outgrowth activity at  
686 each surface of the neuron. For example, there is a high probability for anteriorly directed  
687 outgrowth in *unc-40* mutants, indicating that the cues set a high probability for anterior  
688 nonUNC-40-mediated activity in the mutants. In the figures, a high relative probability for  
689 UNC-40-mediated or nonUNC-40-mediated outgrowth activity at a surface is depicted as red

690 and green areas, respectively. The colored area is concentrated when there is a high  
691 probability for outgrowth in one direction, and the area is more diffuse when the probability  
692 for outgrowth in directions perpendicular to the directional bias are greater. (3) As the  
693 probability of outgrowth decreases in the direction of outgrowth, and the probability of  
694 outgrowth in directions perpendicular to the directional bias become greater, the extent of  
695 movement forward decreases. This idea is based on random walk modeling. Representative  
696 modeling is shown above or to the side of each diagram. 50 random walks from a point on a  
697 line were calculated based on the given probabilities. As the probability for movement in  
698 directions perpendicular to the directional bias become greater, the extent of movement from  
699 the origin decreases. Similarly, we hypothesize that the forward displacement of the  
700 membrane decreases as the probability for perpendicular outgrowth movement become  
701 greater at the surface of the neuronal membrane. (4) Loss of UNC-5 function causes a higher  
702 probability of UNC-40 mediating outgrowth in directions perpendicular to the directional bias.  
703 Loss of MIG-15 reduces the probability of UNC-40-mediated outgrowth in directions  
704 perpendicular to the directional bias. These ideas are based on our observations of the effects  
705 that *unc-5* and *mig-15* mutations have on HSN localization of UNC-40::GFP and the direction of  
706 HSN outgrowth. We further speculate that loss of MIG-15 function increases the probability of  
707 nonUNC-40-mediated outgrowth in directions perpendicular to the directional bias. This is  
708 based on our observation that HSN tends to be bipolar in the *mig-15* mutant (YANG *et al.* 2014),  
709 suggesting that nonUNC-40-mediated outgrowth activity, which drives outgrowth anteriorly in  
710 other mutants, becomes ineffectual.

711

712 **PLM extension phenotype:** We hypothesize that there is high probability for anteriorly  
713 directed outgrowth from the PLM cell body because of the strong effect of a cue(s) which  
714 inhibits outgrowth activity and is present in high concentration posterior to the cell body



715 (Figure 10A, position 1). Dorsal and ventral cues create an equal probability for dorsal and  
716 ventral outgrowth, allowing the UNC-40 SOAL process to cause a high probability for anterior  
717 outgrowth activity (Figure 10B, position 1). At a position that is further anterior (Figure 10A,  
718 position 2), the inhibitory effect of another cue reduces the probability for anterior outgrowth  
719 activity, while increasing the probability of outgrowth in the dorsal and ventral directions. This  
720 does not affect the anterior bias for outgrowth, although it may affect the rate of outgrowth  
721 (Figure 10B, position 2). Cues at an anterior position (Figure 10A, position 3), strongly inhibit  
722 outgrowth and cause a greater probability of outgrowth in the dorsal and ventral directions  
723 (Figure 10B, position 3). This arrests forward outgrowth. However, in some mutants the  
724 inhibitory effect of these cues is not as great, allowing a stronger anterior bias at position 3. As  
725 the outgrowth passes this position (Figure 10A, position 4), a situation similar to position 1 is  
726 reestablished (Figure 10B, position 4).

727

728 We propose that PLM termination and overextension is influenced by the degree to which UNC-  
729 40-mediated outgrowth fluctuates at position 3 (Figure 11). In wildtype, the cues cause the  
730 direction of both UNC-40-mediated and nonUNC-40-mediated outgrowth to fluctuate, resulting  
731 in outgrowth stalling. Loss of UNC-40 function will not alter this. Loss of MIG-15 function  
732 increases the probability of anterior UNC-40-mediated outgrowth by decreasing the degree to  
733 which the direction of UNC-40-mediated outgrowth fluctuates. This allows a stronger anterior  
734 directional bias, which results in the overextension phenotype. Loss of UNC-5 suppresses the  
735 overextension caused by loss of MIG-15 function by increasing the degree to which the  
736 direction of UNC-40-mediated outgrowth fluctuates, reverting the state back towards  
737 wildtype.

738

739 **ALM and AVM nerve ring branching and extension phenotype:** We hypothesize that at the  
740 nerve ring there are cues, including UNC-6, that are arranged along the dorsal/ventral axis.  
741 These cues can promote ALM and AVM axon outgrowth. As an extension nears the nerve ring,  
742 these cues help create a high probability for anterior outgrowth (Figure 12A and 12B, position  
743 1). At the nerve ring, the cues create an equal probability for anterior outgrowth and  
744 outgrowth into the ring (Figure 12A and 12B, position 2). Outgrowth extends into the nerve  
745 ring because the cues of the nerve ring promote outgrowth and because the cues anterior and  
746 posterior to the ring set an equal probability of outgrowth in those directions (Figure 12A and  
747 12B, position 3). Outgrowth can also extend anteriorly from the nerve ring if cues anterior to  
748 position 2 also promote outgrowth and cues dorsal and ventral create an equal probability of  
749 outgrowth in those directions (Figure 12A and 12B, position 4).

750

751 We propose that ALM and AVM nerve ring branching and extension at the nerve ring is  
752 influenced by the degree to which UNC-40-mediated outgrowth fluctuates at position 2 (Figure  
753 13). In wildtype, the nerve ring cues create a higher probability for UNC-40-mediated  
754 outgrowth into the nerve ring. In UNC-40 mutants, the axons often fail to branch into the nerve  
755 ring but they still project further anterior, suggesting that the probability for anterior nonUNC-  
756 40-mediated outgrowth is high in the *unc-40* mutant. Loss of MIG-15 function does not affect  
757 the branching and extension because the higher probability for UNC-40-mediated outgrowth  
758 activity remains. In *unc-40;mig-15* mutants, there is extension in both directions because loss  
759 of MIG-15 function increases the probability of nonUNC-40-mediated outgrowth in other  
760 directions and the nonUNC-40-mediated outgrowth allows outgrowth into the nerve ring. In  
761 *unc-5;mig-15* mutants, the direction of both UNC-40-mediated and nonUNC-40-mediated  
762 outgrowth fluctuate, causing outgrowth stalling in each direction. In these mutants, there is  
763 often an absence of extension both anteriorly and into the nerve ring.

764

765 **HSN extension phenotypes:** We hypothesize that there is high probability for ventrally  
766 directed outgrowth from the HSN cell body because of the strong outgrowth-promoting effect  
767 of the UNC-6 cue, which is in a higher concentration ventral of the cell body (Figure 14A,  
768 position 1). Anterior and posterior cues create an equal probability for anterior and posterior  
769 outgrowth, and there is a high probability for ventral outgrowth activity. As an extension  
770 moves ventrally it encounters higher levels of the UNC-6 cue. The probability of outgrowth  
771 towards the UNC-6 source increases, while the probabilities of outgrowth in the anterior and  
772 posterior decrease (Figure 14B, positions 2). However, as the level of UNC-6 saturates the  
773 receptors the probability for outgrowth in different directions increases, causing outward  
774 movement to stall (Figure 14B, positions 3). The distance from the source of the cue at which  
775 this happens is a function of the concentration of the cues, and the cell's ability to interact and  
776 respond to the cues. If the cell's response to the UNC-6 cue causes a lower probability of  
777 ventral outgrowth than in wildtype, the probabilities of anterior and posterior outgrowth will  
778 be greater (Figure 14B, positions 1, right column). The greater fluctuation will slow the rate of  
779 outgrowth as extension proceeds (Figure 14B, positions 2, right column). Again, at the source  
780 of the cue the response may become saturated and outward movement will stall (Figure 14B,  
781 positions 3, right column). In this scenario, the rate of outgrowth decreases, while the direction  
782 of outgrowth is the same.

783

784 We propose that HSN extension is influenced by the degree to which UNC-40-mediated  
785 outgrowth fluctuates. In wildtype, UNC-40-mediated outgrowth creates a high probability for  
786 the initial ventral outgrowth (Figure 15A, top). Loss of UNC-5 function causes a higher  
787 probability of UNC-40 mediating outgrowth in the anterior and posterior directions, and

788 consequently a decrease in the rate of outgrowth (Figure 15A, second from top). We suggest  
789 this underlies the observation that extensions fail to form in the L1 stage in *unc-5* mutants, but  
790 do form over time, and in the same direction, as in wild-type animals.

791

792 We also propose that controlling the degree to which the direction of UNC-40-mediated  
793 outgrowth fluctuates at points along the surface can regulate the number of processes that  
794 form. We suggest that UNC-40 (DCC), UNC-5 (UNC5), and UNC-6 (netrin) are part of an activator-  
795 inhibitor system (GIERER AND MEINHARDT 1972; MEINHARDT AND GIERER 2000). In an activator-  
796 inhibitor system two substances act on each other. The activator stimulates its own production as  
797 well as produces an inhibitor that can repress the production of the activator. The inhibitor is able to  
798 diffuse more rapidly than the activator, which causes patterns of varying concentrations of activator  
799 and inhibitor. Pattern formation through local symmetry breaking, signal amplification, and long-  
800 range inhibition may involve chemical, mechanical, or coupled mechanochemical processes  
801 (GOEHRING AND GRILL 2013).

802

803 We suggest an activator-inhibitor system in which UNC-40 and UNC-5 are the two substances  
804 that interact with each other (Figure 15B). This is consistent with evidence indicating that  
805 Netrin-1 binds simultaneously to two DCC (UNC-40) molecules or an UNC5/DCC complex (FINCI  
806 *et al.* 2014). In the context of an activator-inhibitor system, UNC-5 signaling acts as an activator  
807 and UNC-40 signaling acts as an inhibitor. The activator and inhibitor activities “diffuse” at  
808 different rates because recruitment of UNC-40 and UNC-5 to the plasma membrane occurs at  
809 different rates. This idea is consistent with imaging experiments of cells in culture which  
810 suggest that netrin-1 (UNC-6) regulates the distribution of DCC (UNC-40) and UNC5B (UNC-5)  
811 at the plasma membrane (GOPAL *et al.* 2016). In these studies, netrin-1 (UNC-6) was shown to  
812 stimulate translocation of DCC (UNC-40) and UNC5B (UNC-5) receptors from intracellular

813 vesicles to the plasma membrane and, further, the transported receptors were shown to  
814 localize at the plasma membrane (GOPAL *et al.* 2016).  
815  
816 We propose that signaling by UNC-6-ligated UNC-40 causes outgrowth activity and stimulates  
817 translocation of UNC-40 to the site (Figure 15B, step 1). If the outgrowth reaches a critical  
818 level of UNC-6 (Figure 15B, step 2), changes to the UNC-6/UNC-40/UNC-5 receptor complexes  
819 increase UNC-5 signaling. UNC-5 signaling inhibits UNC-40 translocation to the site and  
820 increases the relative levels of UNC-5 (short-range autocatalytic). Locally, UNC-40-mediated  
821 outgrowth activity becomes more dispersed, resulting in a slower rate of outgrowth. As UNC-  
822 40 translocation to the leading edge is inhibited, the relative levels of UNC-40 at flanking  
823 surfaces increases (Figure 15B, step 3). These UNC-40 levels inhibit UNC-5 signaling (long-  
824 range inhibition) and prevent the dispersion of UNC-40-mediated outgrowth activity, resulting  
825 in a faster rate of outgrowth at the flanking surfaces. In the context of an activator-inhibitor  
826 system, UNC-5 signaling functions as an activator because it stimulates its own activity by  
827 decreasing the ratio of UNC-40 to UNC-5 at the site of UNC-5 signaling. It also stimulates  
828 production of UNC-40 UNC-5-inhibitory activity by increasing the ratio of UNC-40 to UNC-5 at  
829 the flanking regions. As the flanking regions move further outward due to the UNC-40-  
830 mediated outgrowth activity, UNC-40 translocation to the surface is further stimulated by  
831 increasing levels of the extracellular UNC-6 cue.

832  
833 In this type of model, the reaction and diffusion rates of the substances influence the pattern  
834 that emerges. In the above example, whether the flanking areas branch further depends on  
835 whether the critical level of receptors and extracellular ligands is realized at the flanking  
836 region. The *mig-15(rh148)* mutation and the expression of UNC-6 $\Delta$ C could alter the rate by  
837 which components of the UNC-6/UNC-40/UNC-5 receptor complexes interact or could alter the

838 rate of translocation of the components to the membrane, or both. In fact, cell culture  
839 experiments suggest Netrin VI-V (UNC-6 $\Delta$ C ) induces DCC and UNC5B colocalization, but not  
840 DCC recruitment (GOPAL *et al.* 2016). Moreover, mutations that suppress ectopic branching  
841 induced by UNC-6 $\Delta$ C expression affect members of second messenger systems which could  
842 influence the rates of UNC-40 and UNC-5 interactions and trafficking (WANG AND WADSWORTH  
843 2002).

844

### 845 **A genetic pathway for UNC-40 asymmetric localization**

846 We present a genetic pathway for the asymmetrical localization of UNC-40 based on the phenotype  
847 of robust UNC-40::GFP clustering in HSN. It is worth noting that the SOAL model of axon  
848 outgrowth does not depend on knowledge of the molecular mechanisms of outgrowth. Rather,  
849 the SOAL model uses a statistical approach to understand how a gene influences the collective  
850 impact of all the underlying molecular mechanisms that drives outgrowth. It can be envisioned  
851 that the movement of an extension occurs through innumerable forces acting at the molecular  
852 level. The effect that each molecular event has on movement is not easily observed or  
853 measured. In fact, it may be that patterns of outgrowth can't be fully understood by only  
854 knowing the molecular mechanisms of outgrowth. Instead, the effects that molecular events  
855 collectively have on movement must be understood through a statistical model.

856

857 Nevertheless, a full understanding of the molecular mechanisms underlying the SOAL process is  
858 an important long-term goal. Since we believe that UNC-40::GFP clustering is a readout of that  
859 process, constructing genetic pathways for the clustering of UNC-40::GFP is a step toward this  
860 goal. We wish to know how UNC-5 mediates signaling within HSN that controls the UNC-40  
861 asymmetric localization process. However, a role for UNC-5 in HSN is paradoxical given the

862 widespread idea that UNC-5 mediates a repulsive response to UNC-6 and that HSN outgrowth is  
863 towards the source of UNC-6. All the same, we suggest a cell-autonomous role for UNC-5 in  
864 HSN is the most parsimonious model. First, UNC-5 is an UNC-6 receptor that can mediate  
865 neuronal responses when in complex with UNC-40 (HONG *et al.* 1999; GEISBRECHT *et al.* 2003;  
866 KRUGER *et al.* 2004; FINCI *et al.* 2014). We previously showed that UNC-40 conformational  
867 changes regulate HSN asymmetric localization in HSN (XU *et al.* 2009) and we now show that  
868 UNC-5 regulates UNC-40 asymmetric localization in HSN. It is therefore plausible that UNC-5  
869 affects UNC-40 conformational changes that regulate UNC-40 asymmetric localization. Second,  
870 UNC-5 can alter the number to HSN outgrowths in response to UNC-6 and to the UNC-6 $\Delta$ C  
871 ligand. Directional guidance by UNC-6 and UNC-6 $\Delta$ C is generally normal in an *unc-5* mutant,  
872 suggesting that the ability of UNC-5 to regulate the number of outgrowth is not due to an  
873 alteration in the extracellular distribution of its UNC-6 ligand. Further, the UNC-6 $\Delta$ C ligand and  
874 the *mig-15* mutation create the same outgrowth phenotype, which can be suppressed by loss of  
875 UNC-5 function, and we have shown that MIG-15 acts cell autonomously in HSN to regulate  
876 UNC-40 asymmetric localization (YANG *et al.* 2014). Further, we have shown that the UNC-5-  
877 mediated response that regulates UNC-40 asymmetric localization also depends on UNC-53  
878 (NAV2) (KULKARNI *et al.* 2013), a cytoplasmic protein that functions cell-autonomously for cell  
879 migration and axon guidance (STRINGHAM *et al.* 2002). Together, these observations strongly  
880 suggest that UNC-5 directly regulates signaling within HSN. Third, a role for UNC-5 in the  
881 guidance of AVM and PVM axons towards UNC-6 sources has also been suggested. A synergistic  
882 interaction between *unc-5* and *egl-20* is observed; in either *unc-5* or *egl-20* mutants the ventral  
883 extension of AVM and PVM axons is only slightly impaired, whereas in the double mutants  
884 there is a much greater penetrance (LEVY-STRUMPF AND CULOTTI 2014). The expression of an *unc-*  
885 *5* transgene in AVM and PVM can rescue the AVM and PVM axon guidance defects of the *unc-*  
886 *5;egl-20* double mutant (LEVY-STRUMPF AND CULOTTI 2014). We note that for HSN, transgenic

887 rescue using *unc-5* constructs have not been successful and in wild-type animals UNC-5  
888 expression in HSN has not been reported. As well, expression has not been reported in AVM,  
889 PVM, and PLM wild-type neurons. We suspect there may be technical difficulties or that UNC-5  
890 expression might be low in these cells. UNC-5 is detected in PLM in *rpm-1* mutants, which is  
891 consistent with evidence that UNC-5 activity is required for PLM overextension in these  
892 mutants (Li *et al.* 2008).

893

894 To construct genetic pathways, we use the readout of whether UNC-40::GFP is clearly and  
895 consistently localized to any side of the HSN neuron in different mutants (Figure 9). A  
896 summary of the results is presented (Figure 16A). UNC-6 is required for robust asymmetric  
897 UNC-40 localization; in the absence of UNC-6 function UNC-40 remains uniformly distributed  
898 along the surface of the plasma membrane. The loss of both UNC-53 and UNC-5 function also  
899 results in a uniform distribution, however loss of either one alone does not. This suggests that  
900 UNC-53 and UNC-5 pathways act redundantly downstream of UNC-6 (Figure 16B). Moreover,  
901 we observe there is robust asymmetric UNC-40 localization when there is a loss of UNC-6  
902 activity in addition to the loss of UNC-53 and UNC-5. This suggests a third pathway that is  
903 suppressed by UNC-6 when UNC-53 and UNC-5 activity are missing. Loss of both UNC-5 and  
904 UNC-6 does not allow UNC-40 localization, whereas loss of both UNC-53 and UNC-6 does,  
905 therefore UNC-53, rather than UNC-5, acts with UNC-6 to suppress the third pathway.

906

907 UNC-40 becomes localized when EGL-20 activity is lost. As well, UNC-40 becomes localized  
908 when both EGL-20 and UNC-53 activities are lost. This is consistent with UNC-6 promoting  
909 UNC-40 localization via the UNC-5 pathway. Loss of EGL-20 and UNC-5 prevents UNC-40  
910 localization. In these animals, the UNC-5 pathway is absent and UNC-6 is present to blocks the



911 third pathway, therefore the UNC-53 pathway that leads to UNC-40 localization must require  
912 EGL-20, as well as UNC-6.

913

914 Loss of UNC-6 activity or loss of both UNC-6 and EGL-20 activity prevents localization, whereas  
915 loss of only EGL-20 does not. To explain this, we propose that when UNC-6 is lost, the third  
916 pathway, which would otherwise be activated by the loss of UNC-6, remains suppressed  
917 because EGL-20 activity promotes suppression via UNC-53 activity. This suppression also  
918 explains why loss of UNC-6 and UNC-5 activity does not cause localization.

919

920 Importantly, this genetic analysis indicates that netrin (UNC-6) and wnt (EGL-20) signaling are  
921 integrated to regulate self-organizing UNC-40 asymmetric localization. An implication of this  
922 result is that the extracellular concentrations of UNC-6 and EGL-20 could control the activation  
923 or inhibition of UNC-40-mediated outgrowth. This could be important for generating patterns  
924 of outgrowth when neurons move to new locations within the animal. The picture is  
925 complicated by the evidence that both UNC-6 and EGL-20 affect the SOAL of both UNC-40-  
926 mediated and nonUNC-40-mediated outgrowth activity. It is possible that overlapping sets of  
927 extracellular cues and their receptors are involved in setting the probability of outgrowth for  
928 each activity. SAX-3 and MADD-2 are required for UNC-40::GFP localization, but also affect  
929 nonUNC-40-mediated outgrowth. The *egl-20;sax-3* and *unc-40;sax-3* double mutations have the  
930 greatest effect on restricting the extent of outgrowth movement in any direction (Figures 6 and  
931 7). Moreover, the number of HSN neurites is reduced in *unc-5* mutants, whereas the number in  
932 *unc-5;sax-3* double mutants appears normal (Figure 3B). Understanding the interdependence  
933 of these outgrowth activities will be necessary for better understand how extracellular cues  
934 affect the patterns of outgrowth *in vivo*.

935

936 **Acknowledgments**

937 We thank Caenorhabditis Genetics Center, J. Culotti, and C. Bargmann for strains; we thank  
938 Martha Soto and members of the Soto laboratory for support and helpful discussions; we thank  
939 Bhumi Patel and Leely Rezvani for comments on the manuscript. This work was supported by  
940 grants NS033156 and NS061805 from the National Institutes of Health, National Institute of  
941 Neurological Disorders and Stroke and grant 07-3060-SCR-E-0 from the New Jersey  
942 Commission on Spinal Cord to WGW. This work was also supported by grant DFHS13PPCO28  
943 from the New Jersey Commission on Cancer Research to AM.

944 Table

945

946

Table 1. Direction of Axon Formation from the HSN Cell Body

|                                                | direction of axon protrusion |         |          |           |            | n   | reference                     |
|------------------------------------------------|------------------------------|---------|----------|-----------|------------|-----|-------------------------------|
|                                                | dorsal                       | ventral | anterior | posterior | multipolar |     |                               |
|                                                | %                            | %       | %        | %         | %          |     |                               |
| wildtype                                       | 0                            | 96±2    | 3±2      | 0         | 1±1        | 221 | (KULKARNI <i>et al.</i> 2013) |
| <i>unc-6(ev400)</i>                            | 2±2                          | 3±2     | 81±2     | 8±2       | 6±1        | 218 | (KULKARNI <i>et al.</i> 2013) |
| <i>unc-40(e1430)</i>                           | 2±1                          | 6±2     | 67±2     | 19±1      | 6±1        | 183 | (KULKARNI <i>et al.</i> 2013) |
| <i>unc-5(e53)</i>                              | 0                            | 75±3    | 19±2     | 1±1       | 5±1        | 245 | (YANG <i>et al.</i> 2014)     |
| <i>unc-53(n152)</i>                            | 0                            | 67±3    | 22±2     | 5±1       | 6±1        | 238 | (KULKARNI <i>et al.</i> 2013) |
| <i>sax-3(ky123)</i>                            | 2±1                          | 31±1    | 21±1     | 37±2      | 9±2        | 232 | (TANG AND WADSWORTH 2014)     |
| <i>sax-3(ky200)*</i>                           | 2±1                          | 32±1    | 19±2     | 42±3      | 5±2        | 198 | (TANG AND WADSWORTH 2014)     |
| <i>unc-5(e53);sax-3(ky200)</i>                 | 2±1                          | 40±3    | 24±2     | 28±2      | 6±1        | 120 |                               |
| <i>unc-5(e53);unc-6(ev400)</i>                 | 4±2                          | 5±3     | 59±4     | 22±4      | 9±1        | 201 |                               |
| <i>unc-5(e53);egl-20(n585)</i>                 | 3±1                          | 28±4    | 22±4     | 35±5      | 11±2       | 114 |                               |
| <i>unc-53(n152);unc-5(e53)</i>                 | 0                            | 19±1    | 62±2     | 17±1      | 3±1        | 224 | (KULKARNI <i>et al.</i> 2013) |
| <i>unc-53(n152);unc-6(ev400)</i>               | 24±2                         | 0       | 19±2     | 22±2      | 34±3       | 144 | (KULKARNI <i>et al.</i> 2013) |
| <i>unc-53(n152);sax-3(ky123)</i>               | 1±1                          | 47±3    | 24±2     | 23±5      | 6±3        | 207 | (TANG AND WADSWORTH 2014)     |
| <i>unc-40(e1430);unc-5(e53)</i>                | 5±1                          | 6±1     | 55±2     | 19±2      | 14±1       | 196 | (KULKARNI <i>et al.</i> 2013) |
| <i>unc-40(e1430);sax-3(ky200)*</i>             | 14±3                         | 2±1     | 40±2     | 35±3      | 9±4        | 191 | (TANG AND WADSWORTH 2014)     |
| <i>sax-3(ky200)*; unc-6(ev400)</i>             | 8±1                          | 8±2     | 49±3     | 20±5      | 14±2       | 211 | (TANG AND WADSWORTH 2014)     |
| <i>unc-53(n152);unc-5(e53);unc-6(ev400)</i>    | 23±2                         | 0       | 34±2     | 15±2      | 28±2       | 148 | (KULKARNI <i>et al.</i> 2013) |
| <i>unc-53(n152);sax-3(ky200)*;unc-6(ev400)</i> | 11±2                         | 2±1     | 33±4     | 30±3      | 25±5       | 189 |                               |
| <i>egl-20(n585)</i>                            | 0                            | 64±2    | 21±2     | 7±1       | 8±1        | 304 | (TANG AND WADSWORTH 2014)     |
| <i>egl-20(n585); unc-6(ev400)</i>              | 18±2                         | 0       | 43±2     | 15±2      | 24±2       | 205 | (TANG AND WADSWORTH 2014)     |
| <i>unc-40(e1430); egl-20(n585)</i>             | 6±2                          | 17±2    | 45±5     | 15±2      | 16±2       | 173 | (TANG AND WADSWORTH 2014)     |
| <i>egl-20(n585);sax-3(ky123)</i>               | 1±1                          | 12±2    | 39±2     | 39±1      | 8±3        | 177 | (TANG AND WADSWORTH 2014)     |
| <i>madd-2(tr103)</i>                           | 0                            | 19±2    | 55±5     | 17±4      | 8±2        | 179 |                               |
| <i>madd-2(ky592)</i>                           | 0                            | 52±2    | 43±2     | 5±1       | 0          | 95  |                               |
| <i>unc-5(e53);madd-2(tr103)</i>                | 3±1                          | 15±2    | 52±4     | 17±4      | 13±1       | 197 |                               |
| <i>madd-2(tr103);sax-3(ky123)</i>              | 2                            | 24±3    | 19±4     | 47±1      | 7±2        | 171 |                               |
| <i>unc-53(n152);madd-2(tr103)</i>              | 1±1                          | 15±2    | 43±2     | 17±1      | 24±4       | 148 |                               |
| <i>mig-15(rh326)</i>                           | 2±1                          | 15±1    | 24±3     | 11±3      | 48±8       | 131 | (YANG <i>et al.</i> 2014)     |

Numbers represent percentage value ± SEM.

\*Animals grown at the *sax-3(ky200)* restrictive temperature (25°C).

947

948 **References**

- 949 Adler, C. E., R. D. Fetter and C. I. Bargmann, 2006 UNC-6/Netrin induces neuronal asymmetry and  
950 defines the site of axon formation. *Nat Neurosci* 9: 511-518.
- 951 Aiello, G. L., 2016 Neuro-Percolation as a Superposition of Random-Walks, pp. in *European*  
952 *Symposium on Artificial Neural Networks, Computational Intelligence and Machine Learning*.  
953 i6doc.com Bruges, Belgium.
- 954 Alexander, M., K. K. Chan, A. B. Byrne, G. Selman, T. Lee *et al.*, 2009 An UNC-40 pathway directs  
955 postsynaptic membrane extension in *Caenorhabditis elegans*. *Development* 136: 911-922.
- 956 Alexander, M., G. Selman, A. Seetharaman, K. K. Chan, S. A. D'Souza *et al.*, 2010 MADD-2, a  
957 homolog of the Opitz syndrome protein MID1, regulates guidance to the midline through UNC-40 in  
958 *Caenorhabditis elegans*. *Developmental Cell* 18: 961-972.
- 959 Asakura, T., K. Ogura and Y. Goshima, 2007 UNC-6 expression by the vulval precursor cells of  
960 *Caenorhabditis elegans* is required for the complex axon guidance of the HSN neurons. *Dev Biol*  
961 304: 800-810.
- 962 Chan, S. S., H. Zheng, M. W. Su, R. Wilk, M. T. Killeen *et al.*, 1996 UNC-40, a *C. elegans* homolog  
963 of DCC (Deleted in Colorectal Cancer), is required in motile cells responding to UNC-6 netrin cues.  
964 *Cell* 87: 187-195.
- 965 Chang, C., C. E. Adler, M. Krause, S. G. Clark, F. B. Gertler *et al.*, 2006 MIG-10/Lamellipodin and  
966 AGE-1/PI3K Promote Axon Guidance and Outgrowth in Response to Slit and Netrin. *Curr Biol* 16:  
967 854-862.
- 968 Chapman, J. O., H. Li and E. A. Lundquist, 2008 The MIG-15 NIK kinase acts cell-autonomously in  
969 neuroblast polarization and migration in *C. elegans*. *Dev Biol* 324: 245-257.
- 970 Colavita, A., and J. G. Culotti, 1998 Suppressors of ectopic UNC-5 growth cone steering identify  
971 eight genes involved in axon guidance in *Caenorhabditis elegans*. *Dev Biol* 194: 72-85.
- 972 Colon-Ramos, D. A., M. A. Margeta and K. Shen, 2007 Glia promote local synaptogenesis through  
973 UNC-6 (netrin) signaling in *C. elegans*. *Science* 318: 103-106.
- 974 Finci, L. I., N. Krüger, X. Sun, J. Zhang, M. Chegkazi *et al.*, 2014 The crystal structure of netrin-1 in  
975 complex with DCC reveals the bifunctionality of netrin-1 as a guidance cue. *Neuron* 83: 839-849.

- 976 Geisbrecht, B. V., K. A. Dowd, R. W. Barfield, P. A. Longo and D. J. Leahy, 2003 Netrin binds  
977 discrete subdomains of DCC and UNC5 and mediates interactions between DCC and heparin. *J Biol*  
978 *Chem* 278: 32561-32568.
- 979 Gierer, A., and H. Meinhardt, 1972 A theory of biological pattern formation. *Kybernetik* 12: 30-39.
- 980 Goehring, N. W., and S. W. Grill, 2013 Cell polarity: mechanochemical patterning. *Trends Cell Biol*  
981 23: 72-80.
- 982 Gopal, A. A., B. Rappaz, V. Rouger, I. B. Martyn, P. D. Dahlberg *et al.*, 2016 Netrin-1-Regulated  
983 Distribution of UNC5B and DCC in Live Cells Revealed by TICCS. *Biophys J* 110: 623-634.
- 984 Hagedorn, E. J., J. W. Ziel, M. A. Morrissey, L. M. Linden, Z. Wang *et al.*, 2013 The netrin receptor  
985 DCC focuses invadopodia-driven basement membrane transmigration in vivo. *J Cell Biol* 201: 903-  
986 913.
- 987 Hao, J. C., C. E. Adler, L. Mebane, F. B. Gertler, C. I. Bargmann *et al.*, 2010 The tripartite motif  
988 protein MADD-2 functions with the receptor UNC-40 (DCC) in Netrin-mediated axon attraction and  
989 branching. *Dev Cell* 18: 950-960.
- 990 Hao, J. C., T. W. Yu, K. Fujisawa, J. G. Culotti, K. Gengyo-Ando *et al.*, 2001 *C. elegans* Slit Acts in  
991 Midline, Dorsal-Ventral, and Anterior-Posterior Guidance via the SAX-3/Robo Receptor. *Neuron* 32:  
992 25-38.
- 993 Hedgecock, E. M., J. G. Culotti and D. H. Hall, 1990 The *unc-5*, *unc-6*, and *unc-40* genes guide  
994 circumferential migrations of pioneer axons and mesodermal cells on the epidermis in *C. elegans*.  
995 *Neuron* 4: 61-85.
- 996 Hong, K., L. Hinck, M. Nishiyama, M. M. Poo, M. Tessier-Lavigne *et al.*, 1999 A ligand-gated  
997 association between cytoplasmic domains of UNC5 and DCC family receptors converts netrin-  
998 induced growth cone attraction to repulsion. *Cell* 97: 927-941.
- 999 Keleman, K., and B. J. Dickson, 2001 Short- and long-range repulsion by the *Drosophila* Unc5 netrin  
1000 receptor. *Neuron* 32: 605-617.
- 1001 Killeen, M., J. Tong, A. Krizus, R. Steven, I. Scott *et al.*, 2002 UNC-5 function requires  
1002 phosphorylation of cytoplasmic tyrosine 482, but its UNC-40-independent functions also require a  
1003 region between the ZU-5 and death domains. *Dev Biol* 251: 348-366.
- 1004 Killeen, M. T., 2009 The dual role of the ligand UNC-6/Netrin in both axon guidance and  
1005 synaptogenesis in *C. elegans*. *Cell Adh Migr* 3: 268-271.

- 1006 Kruger, R. P., J. Lee, W. Li and K. L. Guan, 2004 Mapping netrin receptor binding reveals domains  
1007 of Unc5 regulating its tyrosine phosphorylation. *J Neurosci* 24: 10826-10834.
- 1008 Kulkarni, G., Z. Xu, A. M. Mohamed, H. Li, X. Tang *et al.*, 2013 Experimental evidence for UNC-6  
1009 (netrin) axon guidance by stochastic fluctuations of intracellular UNC-40 (DCC) outgrowth activity.  
1010 *Biol Open* 2: 1300-1312.
- 1011 Lai Wing Sun, K., J. P. Correia and T. E. Kennedy, 2011 Netrins: versatile extracellular cues with  
1012 diverse functions. *Development* 138: 2153-2169.
- 1013 Leung-Hagesteijn, C., A. M. Spence, B. D. Stern, Y. Zhou, M. W. Su *et al.*, 1992 UNC-5, a  
1014 transmembrane protein with immunoglobulin and thrombospondin type 1 domains, guides cell and  
1015 pioneer axon migrations in *C. elegans*. *Cell* 71: 289-299.
- 1016 Levy-Strumpf, N., and J. G. Culotti, 2014 Netrins and Wnts function redundantly to regulate antero-  
1017 posterior and dorso-ventral guidance in *C. elegans*. *PLoS Genet* 10: e1004381.
- 1018 Li, H., G. Kulkarni and W. G. Wadsworth, 2008 RPM-1, a *Caenorhabditis elegans* protein that  
1019 functions in presynaptic differentiation, negatively regulates axon outgrowth by controlling SAX-  
1020 3/robo and UNC-5/UNC5 activity. *J Neurosci* 28: 3595-3603.
- 1021 Lim, Y. S., S. Mallapur, G. Kao, X. C. Ren and W. G. Wadsworth, 1999 Netrin UNC-6 and the  
1022 regulation of branching and extension of motoneuron axons from the ventral nerve cord of  
1023 *Caenorhabditis elegans*. *J Neurosci* 19: 7048-7056.
- 1024 MacNeil, L. T., W. R. Hardy, T. Pawson, J. L. Wrana and J. G. Culotti, 2009 UNC-129 regulates the  
1025 balance between UNC-40 dependent and independent UNC-5 signaling pathways. *Nat Neurosci* 12:  
1026 150-155.
- 1027 Maes, T., A. Barcelo and C. Buesa, 2002 Neuron navigator: a human gene family with homology to  
1028 *unc-53*, a cell guidance gene from *Caenorhabditis elegans*. *Genomics* 80: 21-30.
- 1029 Manser, J., C. Roonprapunt and B. Margolis, 1997 *C. elegans* cell migration gene *mig-10* shares  
1030 similarities with a family of SH2 domain proteins and acts cell nonautonomously in excretory canal  
1031 development. *Dev Biol* 184: 150-164.
- 1032 Manser, J., and W. B. Wood, 1990 Mutations affecting embryonic cell migrations in *Caenorhabditis*  
1033 *elegans*. *Dev Genet* 11: 49-64.
- 1034 McShea, M. A., K. L. Schmidt, M. L. Dubuke, C. E. Baldiga, M. E. Sullender *et al.*, 2013 Abelson  
1035 interactor-1 (ABI-1) interacts with MRL adaptor protein MIG-10 and is required in guided cell  
1036 migrations and process outgrowth in *C. elegans*. *Dev Biol* 373: 1-13.

- 1037 Meinhardt, H., and A. Gierer, 2000 Pattern formation by local self-activation and lateral inhibition.  
1038 *Bioessays* 22: 753-760.
- 1039 Merz, D. C., H. Zheng, M. T. Killeen, A. Krizus and J. G. Culotti, 2001 Multiple signaling  
1040 mechanisms of the unc-6/netrin receptors unc-5 and unc-40/dcc in vivo. *Genetics* 158: 1071-1080.
- 1041 Moore, S. W., M. Tessier-Lavigne and T. E. Kennedy, 2007 Netrins and their receptors. *Adv Exp*  
1042 *Med Biol* 621: 17-31.
- 1043 Morikawa, R. K., T. Kanamori, K. Yasunaga and K. Emoto, 2011 Different levels of the Tripartite  
1044 motif protein, Anomalies in sensory axon patterning (Asap), regulate distinct axonal projections of  
1045 *Drosophila* sensory neurons. *Proc Natl Acad Sci U S A* 108: 19389-19394.
- 1046 Norris, A. D., and E. A. Lundquist, 2011 UNC-6/netrin and its receptors UNC-5 and UNC-40/DCC  
1047 modulate growth cone protrusion in vivo in *C. elegans*. *Development*.
- 1048 Pan, C. L., J. E. Howell, S. G. Clark, M. Hilliard, S. Cordes *et al.*, 2006 Multiple Wnts and frizzled  
1049 receptors regulate anteriorly directed cell and growth cone migrations in *Caenorhabditis elegans*. *Dev*  
1050 *Cell* 10: 367-377.
- 1051 Poinat, P., A. De Arcangelis, S. Sookhareea, X. Zhu, E. M. Hedgecock *et al.*, 2002 A conserved  
1052 interaction between beta1 integrin/PAT-3 and Nck-interacting kinase/MIG-15 that mediates  
1053 commissural axon navigation in *C. elegans*. *Curr Biol* 12: 622-631.
- 1054 Poon, V. Y., M. P. Klassen and K. Shen, 2008 UNC-6/netrin and its receptor UNC-5 locally exclude  
1055 presynaptic components from dendrites. *Nature*.
- 1056 Quinn, C. C., D. S. Pfeil, E. Chen, E. L. Stovall, M. V. Harden *et al.*, 2006 UNC-6/netrin and SLT-  
1057 1/slit guidance cues orient axon outgrowth mediated by MIG-10/RIAM/lamellipodin. *Curr Biol* 16:  
1058 845-853.
- 1059 Quinn, C. C., D. S. Pfeil and W. G. Wadsworth, 2008 CED-10/Rac1 mediates axon guidance by  
1060 regulating the asymmetric distribution of MIG-10/lamellipodin. *Curr Biol* 18: 808-813.
- 1061 Ren, X. C., S. Kim, E. Fox, E. M. Hedgecock and W. G. Wadsworth, 1999 Role of netrin UNC-6 in  
1062 patterning the longitudinal nerves of *Caenorhabditis elegans*. *J Neurobiol* 39: 107-118.
- 1063 Shakir, M. A., J. S. Gill and E. A. Lundquist, 2006 Interactions of UNC-34 Enabled with Rac  
1064 GTPases and the NIK kinase MIG-15 in *Caenorhabditis elegans* axon pathfinding and neuronal  
1065 migration. *Genetics* 172: 893-913.

- 1066 Song, S., Q. Ge, J. Wang, H. Chen, S. Tang *et al.*, 2011 TRIM-9 functions in the UNC-6/UNC-40  
1067 pathway to regulate ventral guidance. *Journal of genetics and genomics = Yi chuan xue bao* 38: 1-11.
- 1068 Stringham, E., N. Pujol, J. Vandekerckhove and T. Bogaert, 2002 unc-53 controls longitudinal  
1069 migration in *C. elegans*. *Development* 129: 3367-3379.
- 1070 Stringham, E. G., and K. L. Schmidt, 2009 Navigating the cell: UNC-53 and the navigators, a family  
1071 of cytoskeletal regulators with multiple roles in cell migration, outgrowth and trafficking. *Cell*  
1072 *adhesion & migration* 3: 342-346.
- 1073 Tang, X., and W. G. Wadsworth, 2014 SAX-3 (Robo) and UNC-40 (DCC) Regulate a Directional  
1074 Bias for Axon Guidance in Response to Multiple Extracellular Cues. *PLoS One* 9: e110031.
- 1075 Tessier-Lavigne, M., and C. S. Goodman, 1996 The molecular biology of axon guidance. *Science*  
1076 274: 1123-1133.
- 1077 Teulière, J., C. Gally, G. Garriga, M. Labouesse and E. Georges-Labouesse, 2011 MIG-15 and ERM-  
1078 1 promote growth cone directional migration in parallel to UNC-116 and WVE-1. *Development* 138:  
1079 4475-4485.
- 1080 Wadsworth, W. G., H. Bhatt and E. M. Hedgecock, 1996 Neuroglia and pioneer neurons express  
1081 UNC-6 to provide global and local netrin cues for guiding migrations in *C. elegans*. *Neuron* 16: 35-  
1082 46.
- 1083 Wadsworth, W. G., and E. M. Hedgecock, 1996 Hierarchical guidance cues in the developing  
1084 nervous system of *C. elegans*. *Bioessays* 18: 355-362.
- 1085 Wang, Q., and W. G. Wadsworth, 2002 The C domain of netrin UNC-6 silences calcium/calmodulin-  
1086 dependent protein kinase- and diacylglycerol-dependent axon branching in *Caenorhabditis elegans*. *J*  
1087 *Neurosci* 22: 2274-2282.
- 1088 Wang, Z., Y. Hou, X. Guo, M. van der Voet, M. Boxem *et al.*, 2013 The EBAX-type Cullin-RING  
1089 E3 ligase and Hsp90 guard the protein quality of the SAX-3/Robo receptor in developing neurons.  
1090 *Neuron* 79: 903-916.
- 1091 Wang, Z., L. M. Linden, K. M. Naegeli, J. W. Ziel, Q. Chi *et al.*, 2014 UNC-6 (netrin) stabilizes  
1092 oscillatory clustering of the UNC-40 (DCC) receptor to orient polarity. *J Cell Biol* 206: 619-633.
- 1093 Xu, Y., H. Taru, Y. Jin and C. C. Quinn, 2015 SYD-1C, UNC-40 (DCC) and SAX-3 (Robo) function  
1094 interdependently to promote axon guidance by regulating the MIG-2 GTPase. *PLoS Genet* 11:  
1095 e1005185.



- 1096 Xu, Z., H. Li and W. G. Wadsworth, 2009 The roles of multiple UNC-40 (DCC) receptor-mediated  
1097 signals in determining neuronal asymmetry induced by the UNC-6 (netrin) ligand. *Genetics* 183:  
1098 941-949.
- 1099 Yang, Y., W. S. Lee, X. Tang and W. G. Wadsworth, 2014 Extracellular Matrix Regulates UNC-6  
1100 (Netrin) Axon Guidance by Controlling the Direction of Intracellular UNC-40 (DCC) Outgrowth  
1101 Activity. *PLoS One* 9: e97258.
- 1102 Yoshimura, S., J. I. Murray, Y. Lu, R. H. Waterston and S. Shaham, 2008 mls-2 and vab-3 Control  
1103 glia development, hlh-17/Olig expression and glia-dependent neurite extension in *C. elegans*.  
1104 *Development* 135: 2263-2275.
- 1105 Zallen, J. A., B. A. Yi and C. I. Bargmann, 1998 The conserved immunoglobulin superfamily  
1106 member SAX-3/Robo directs multiple aspects of axon guidance in *C. elegans*. *Cell* 92: 217-227.
- 1107 Ziel, J. W., E. J. Hagedorn, A. Audhya and D. R. Sherwood, 2009 UNC-6 (netrin) orients the  
1108 invasive membrane of the anchor cell in *C. elegans*. *Nat Cell Biol* 11: 183-189.
- 1109

1110 **Figure 1. Model for UNC-40 self-organizing polarization and random walk movement.**

1111 (A) Along the plasma membrane, complexes comprising UNC-40 and UNC-5 interact with  
1112 extracellular cues. A self-organizing process is triggered. In wild-type animals (top) there is a  
1113 high probability that complexes associated with specific levels of the extracellular cues will  
1114 mediate outgrowth activity. Compared to wildtype, in animals with loss of UNC-5 function  
1115 (bottom) the probability of these same complexes mediating outgrowth activity is lower and  
1116 the probability that the other complexes instead will mediate outgrowth is higher. Direction is  
1117 labeled left, down, and right, in reference to the orientation of the figure and to emphasize that  
1118 the model is not referring to any specific cues or their sources in the animal. (B) Two sets of  
1119 tracks are shown to compare random walk models derived from representative wildtype and  
1120 mutant experimental results. Compared to wildtype, the mutant has a lower probability of  
1121 outgrowth in one specific direction (down) and a higher probability of outgrowth in other  
1122 directions (left and right). Using the probability distributions shown below the tracks, 50  
1123 simulated random walks of 500 steps were plotted from an origin. This comparison  
1124 emphasizes that even though the direction of movement is the same, there is a difference in the  
1125 average displacement. We propose this property of movement is manifested during neuronal  
1126 extension in wildtype and mutant animals as a difference in the rate of outgrowth. In statistical  
1127 physics, net movement through the action of random motion is diffusion. Here, each track  
1128 models the trajectory that mass of the plasma membrane could move during extension. The  
1129 probability density function of the position of the mass as a function of space and time is  
1130 described by an advection-diffusion equation. In summary, we suggest that the advection-  
1131 diffusion model can be used to describe the process by which mass at the leading edge of an  
1132 extension is transported and that our results describe how genes regulate this transport.

1133

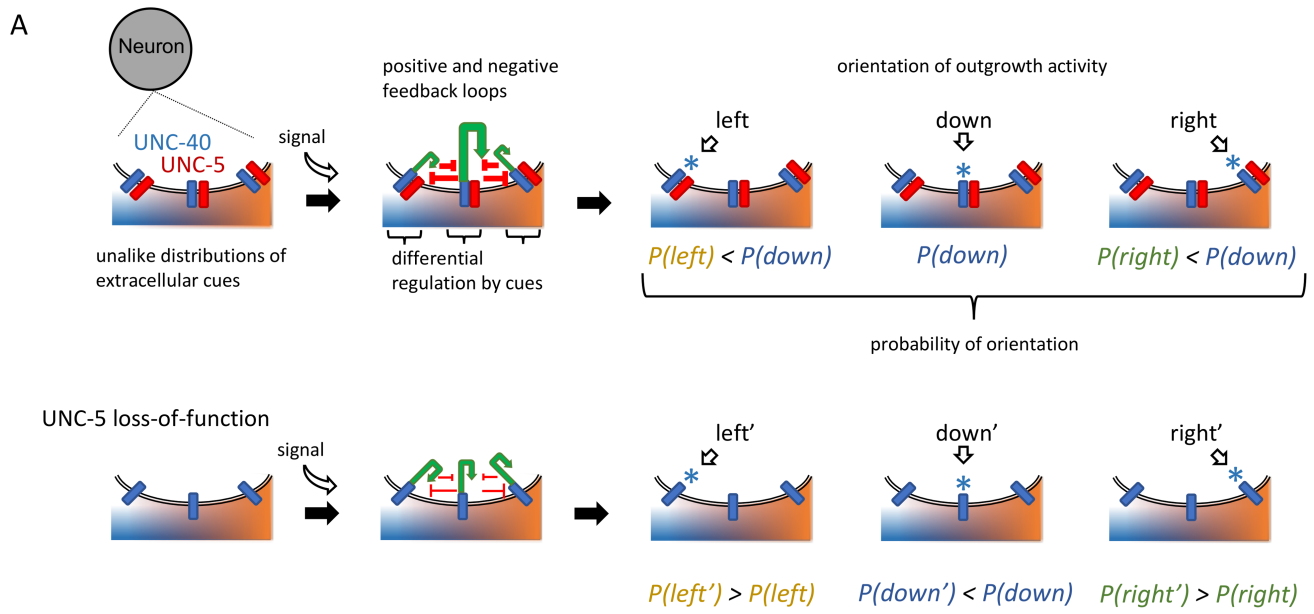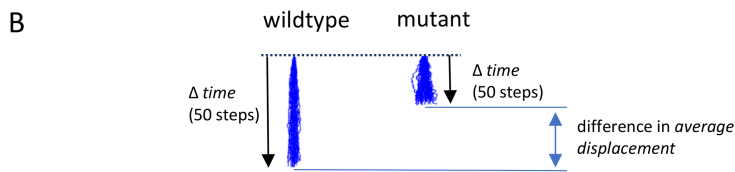

Example:

|                   |   |     |      |   |                    |
|-------------------|---|-----|------|---|--------------------|
| $P(\text{right})$ | = | 0.1 | 0.33 | = | $P(\text{right}')$ |
| $P(\text{left})$  | = | 0.1 | 0.33 | = | $P(\text{left}')$  |
| $P(\text{down})$  | = | 0.8 | 0.33 | = | $P(\text{down}')$  |

1134

1135

1136 **Figure 2. Model for outgrowth movement based on the SOAL model.** Schematic diagrams  
1137 of the outgrowth of a neuron (gray) through an environment of multiple extracellular cues.  
1138 These cues may be molecules presented at the surfaces of surrounding cells and extracellular  
1139 matrix. The extracellular cues are represented here as color gradients of purple, blue, and  
1140 orange. Outgrowth activity is mediated at the surface of the neuron through receptor activity.  
1141 UNC-40-mediated activity is depicted in red, and nonUNC-40-mediated in green. The relative  
1142 probability of activity along the surface is represented by the extent to which the colored areas  
1143 cover the neuron's surface. Increasing the degree to which the direction of activity fluctuates  
1144 over time decreases the extent of outward movement. Random walk models depicting this  
1145 property are shown above each diagram. See text for details. **(A)** Depicted is the movement of  
1146 a neuronal extension towards a source of a cue(s) (orange). At time 1 (top) the probability of  
1147 outgrowth towards the source is high, however at time 2 (bottom) the probability of outgrowth  
1148 in other directions increases as more receptors away from the leading edge are stimulated due  
1149 to the higher concentration of the cue. This increases the degree to which the direction of  
1150 activity fluctuates over time and decreases the extent of outward movement. **(B)** Depicted is  
1151 the movement of a neuronal extension in wildtype (top) and an *unc-5* mutant (bottom). Loss of  
1152 UNC-5 affects the UNC-40 SOAL process and causes more receptor activity away from the  
1153 leading edge, thus decreasing the probability of outgrowth towards the source and increasing  
1154 the probability of outgrowth in other directions. This increases the degree to which the  
1155 direction of activity fluctuates over time and decreases the extent of outward movement.  
1156 Under the same conditions, the rate of outward movement is reduced in *unc-5* mutants as  
1157 compared to wildtype.

1158

1159

1160

1161

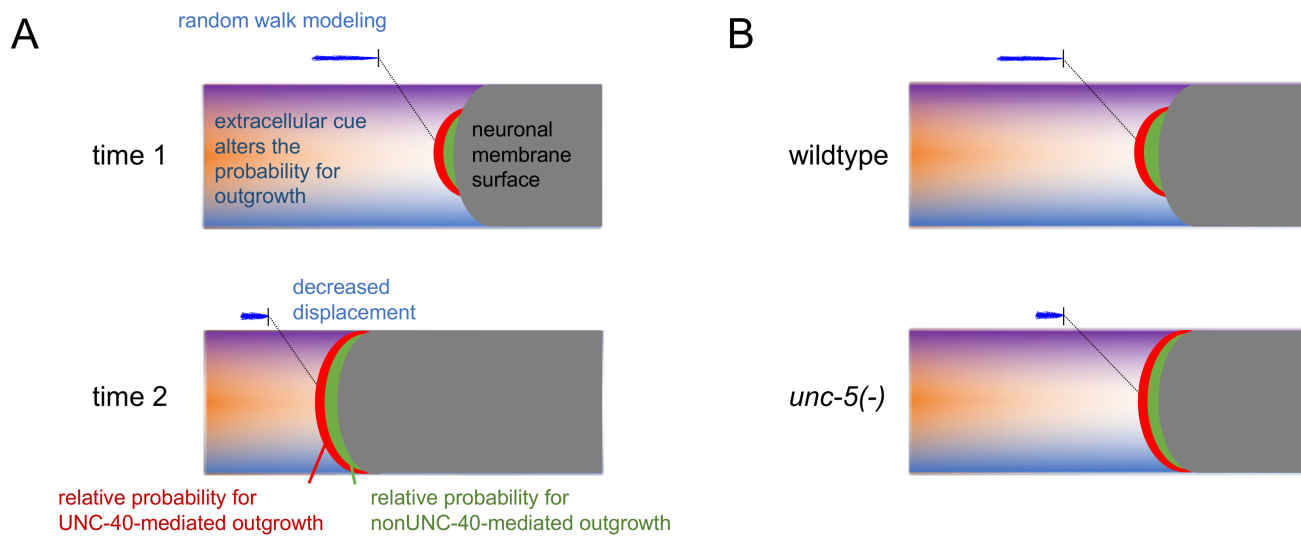

1162

1163

1164

1165 **Figure 3. UNC-5 regulates the patterning of outgrowth extensions from HSN. (A)**

1166 Photomicrographs of HSN at the L1, L2, and adult stages in wildtype and *unc-5(e53)* mutants.

1167 In L1 and L2 animals neurite extensions (arrows) are often observed in wild-type animals but

1168 are more rare in *unc-5* mutants. The short ventral migration of the cell body that occurs in

1169 wild-type animal sometimes fails in *unc-5* mutants, leaving the cell body farther from the PLM

1170 axon (arrowhead) with a single longer ventral extension. The position of the cell body remains

1171 dorsal. Scale bar: 10  $\mu$ m. **(B)** The percentage of HSN neuron with 0, 1, or more than 1 neurite

1172 extension at the L1 stage. In *unc-5* mutants nearly half of the neurons do not extend a process.

1173 Error bars indicated the standard error mean; n values are indicated above each column.

1174 Significant differences (two-tailed t-test), \*P<0.001. **(C)** The percentage of HSN neurons with a

1175 single long extension at the L2 stage. Several *unc-5* alleles were tested as described in the text.

1176 In mutants with loss-of-function there is more often a single extension from the cell body and

1177 the cell body is dorsally mispositioned. **(D)** Photomicrographs of HSN at the early L4, late L4,

1178 and adult stages in wildtype and in animals expressing UNC-6 $\Delta$ C. The expression of UNC-6 $\Delta$ C

1179 induces multiple processes, most often two major extensions, that are guided ventrally. **(E)** The

1180 percentage of HSN neurons with a cell body mispositioned dorsally at the L2 stage. In loss-of-

1181 function mutants the cell body often fails to undertake a short ventral migration during the L2

1182 stage. The migration is not delayed, but rather it remains dorsal. **(F)** The percentage of HSN

1183 neurons with multiple ventral extensions at the L4 stage. The additional processes induced by

1184 UNC-6 $\Delta$ C can be suppressed by *unc-5* and *mig-10* mutations. Additional processes induced by

1185 *mig-15(rh148)* can also be suppressed by the *unc-5* mutation. **(G)** Photomicrographs of HSN at

1186 adult stages in a *mig-15* mutant. Similar to UNC-6 $\Delta$ C expression, *mig-15* mutations can also

1187 cause additional processes that are guided ventrally (YANG *et al.* 2014).

1188

1189

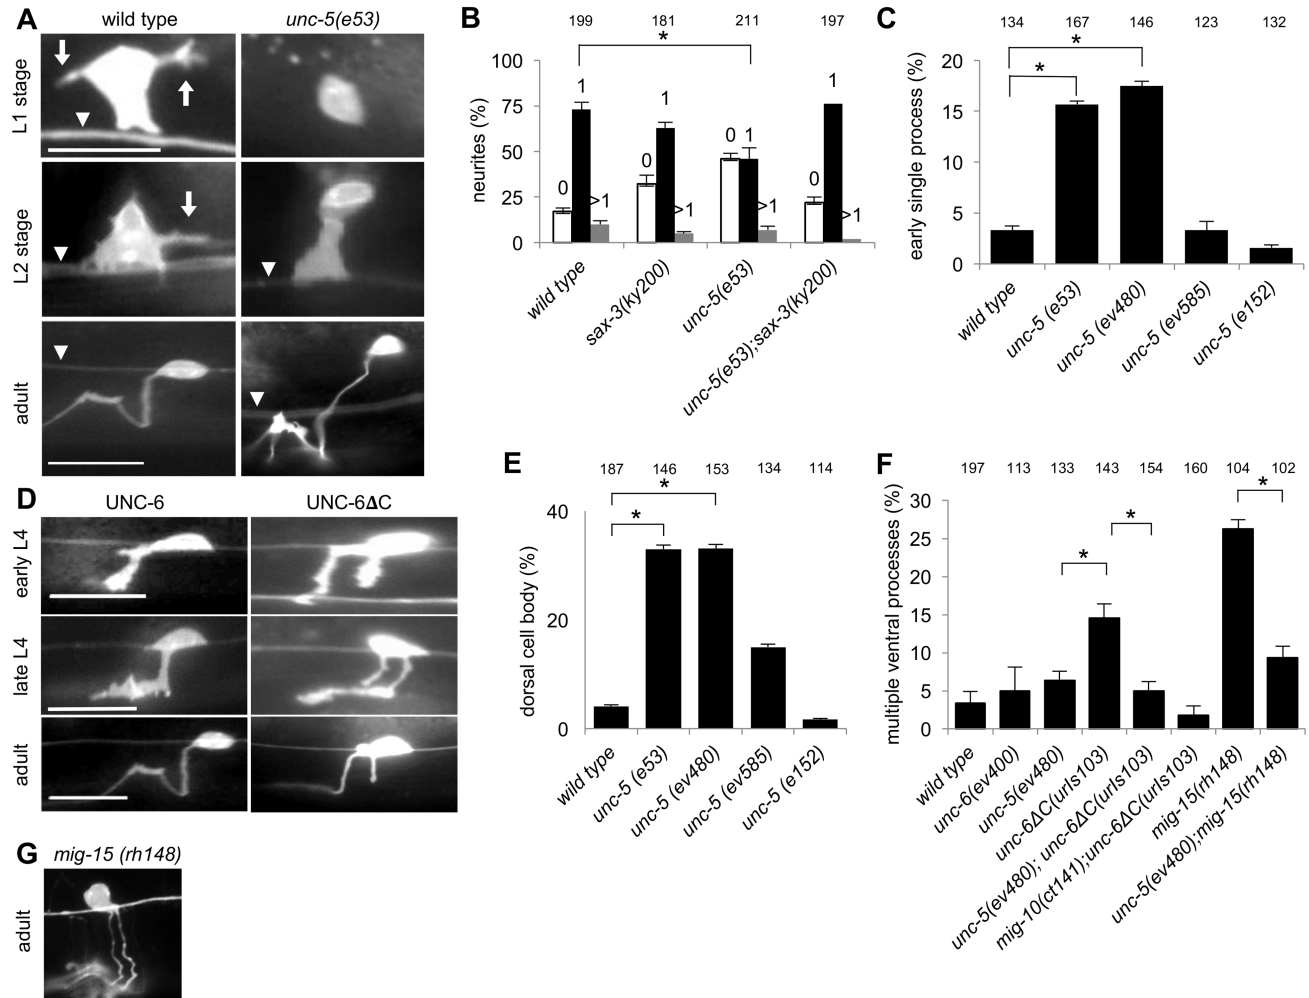

1190

1191 **Figure 4 UNC-5 regulates the patterning of extension from ALM, AVM, and PLM. (A)**

1192 Photomicrographs of the ALM, AVM, and PLM neurons at the L4 stage in wild-type animals and  
1193 *mig-15* mutants. In wildtype (top) a single PLM axon travels anteriorly from the posterior cell  
1194 body (not shown). Near the vulva (arrow) the axon branches; one branch extends to the  
1195 ventral nerve chord and another extends anteriorly. The anterior extension terminates before  
1196 reaching the area of the ALM cell body. In *mig-15* mutants the PLM can extend anteriorly past  
1197 the ALM cell body (bottom). **(B)** The percentage of PLM neurons where the PLM neuron  
1198 extend anteriorly past the ALM cell body. The anterior extension often over-extends in *mig-15*  
1199 mutants. Loss of *unc-5* or *unc-40* function can suppress this phenotype. **(C)** Photomicrographs  
1200 of the ALM and AVM neurons at the L4 stage in wild-type animals and mutants showing  
1201 different patterns of outgrowth extension. In wildtype (top) a single axon travels anteriorly to  
1202 the nerve ring (arrowheads). At the nerve ring the axon branches; one branch extends further  
1203 anteriorly and the other extends into the nerve ring. In mutants, one or both axons may only  
1204 extend anteriorly and will not extend into the nerve ring (second from top). Or one or both  
1205 axons will only extend into the nerve ring and will not extend anteriorly (third from top). Or  
1206 one or both axons will fail to extend into either the nerve ring or anteriorly (bottom). Scale bar:  
1207 20  $\mu\text{m}$ . **(D)** The percentage of AVM neurons where the AVM neuron failed to extend into the  
1208 nerve ring. The neuron often fails to extend in the *unc-40* and *mig-15;unc-5* mutants, whereas it  
1209 does extend in the *mig-15*, *unc-5*, and *mig-15;unc-40* mutants. Error bars indicated the standard  
1210 error mean; n values are indicated above each column. Significant differences (two-tailed t-  
1211 test), \* $P < 0.001$ . **(E)** The percentage of AVM neurons where the AVM neuron failed to extend  
1212 anteriorly, past the nerve ring. The neuron often fails to extend anteriorly in the *mig-15;unc-5*  
1213 mutants, whereas it does extend in the *mig-15*, *unc-5*, *unc-40*, and *unc-40;mig-15* mutants. There  
1214 is a significant difference between the *unc-40* and *unc-40;mig-15* mutants.

1215  
1216



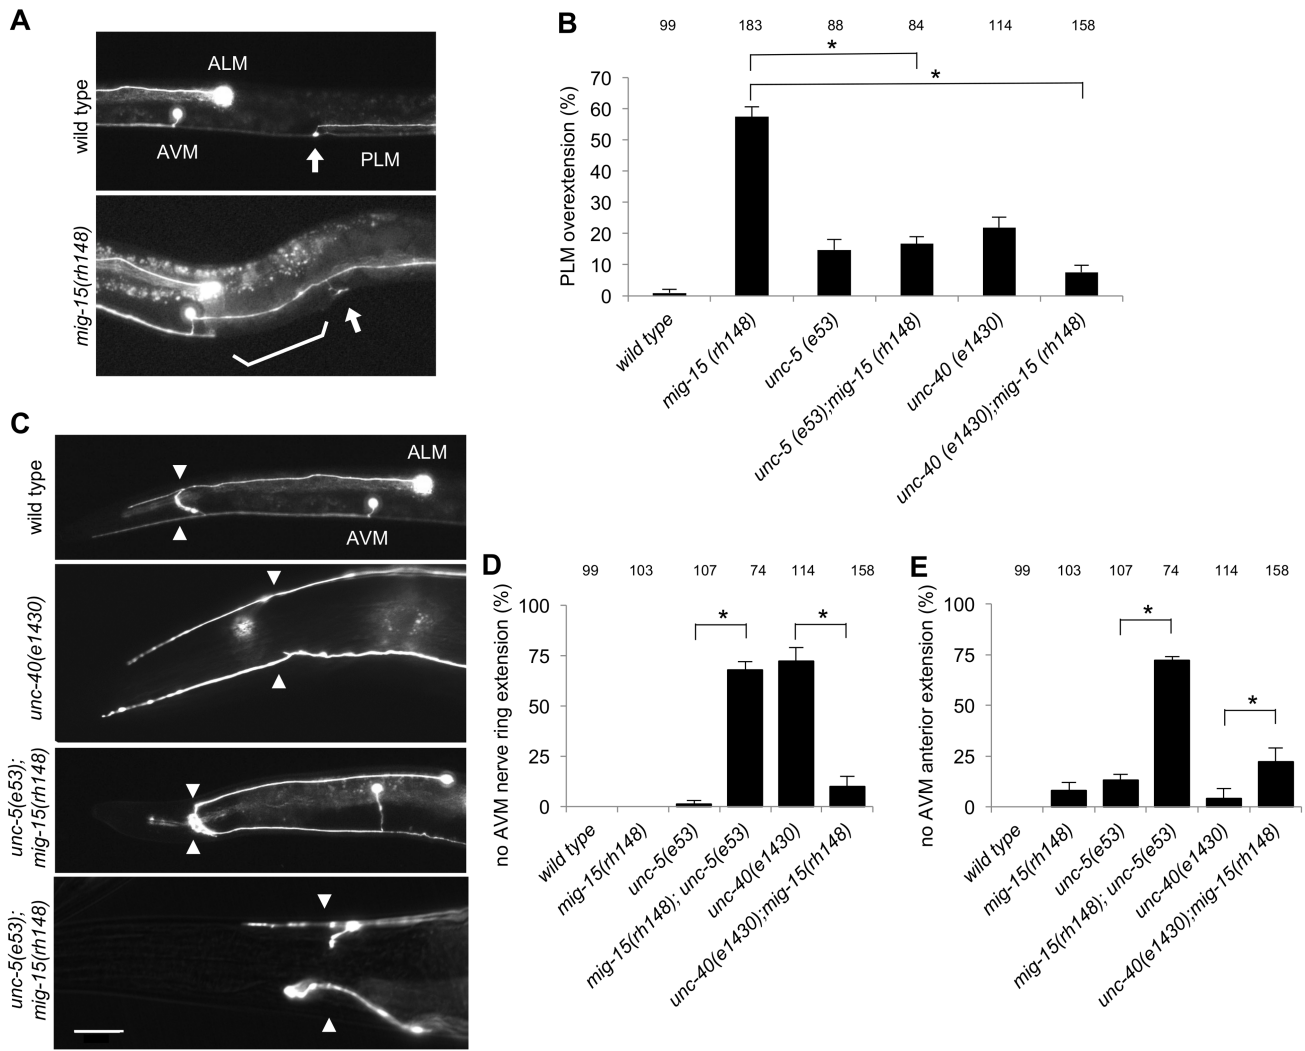

1217  
1218

1219 **Figure 5 Assay to measure the effects a mutation has on movement.** (A) The direction of  
1220 outgrowth extension from the HSN cell body can vary and whether the axon developed in the  
1221 dorsal, anterior, posterior, or ventral direction in L4 stage animals is scored (left panel). This  
1222 creates a probability distribution in which the direction ( $X$ ) is a random variable (center panel).  
1223 A simple random walk is generated by using the same probability distribution for a succession  
1224 of steps with an equal time interval (right panel). (B) For wildtype and two mutants, 50  
1225 simulated random walks of 500 steps were plotted from an origin (0,0). The results graphically  
1226 indicate the directional bias for movement. For random walk movement created in mutant A  
1227 (red, results from *unc-5(e53)*), the directional bias is shifted anteriorly (left) relative to  
1228 wildtype. The results also graphically show the displacement of movement. For random walk  
1229 movement created in mutant B (blue, results from *egl-20(n585);sax-3(ky123)*), the average of  
1230 the final position (displacement) from the origin is a much shorter distance than wildtype. (C)  
1231 Plots of the normal distribution of the final position along the x axis of the random walk tracks  
1232 shown in B. The mean position for each is set at 0. The plots graphically illustrate how random  
1233 walks constructed from the probability distribution for the direction of outgrowth extensions  
1234 can reveal a diffusion process.

1235

1236

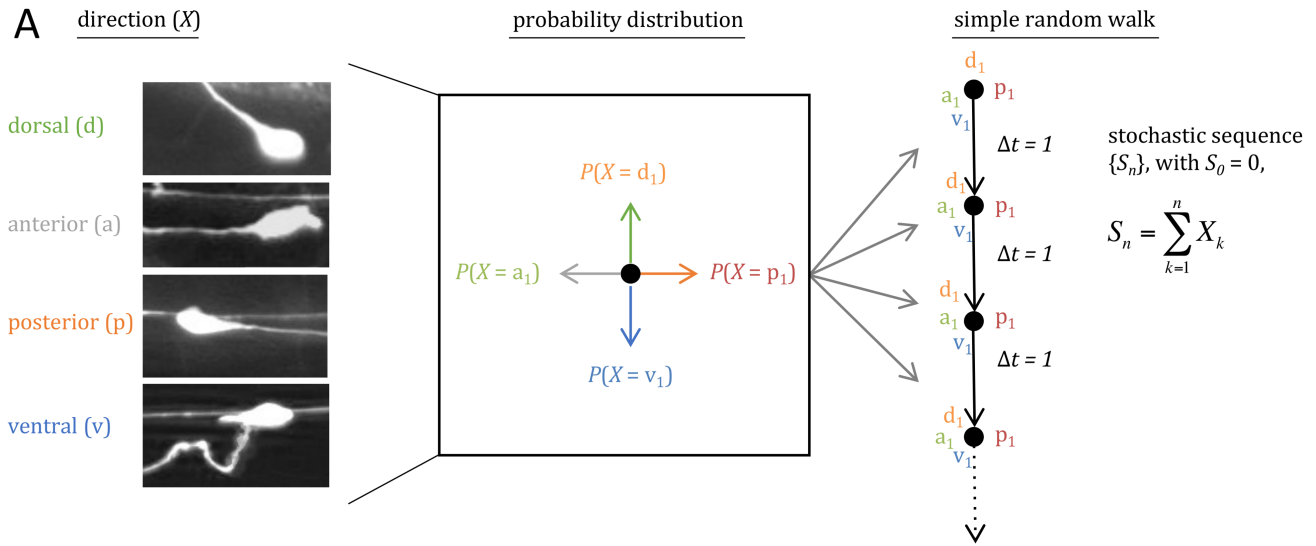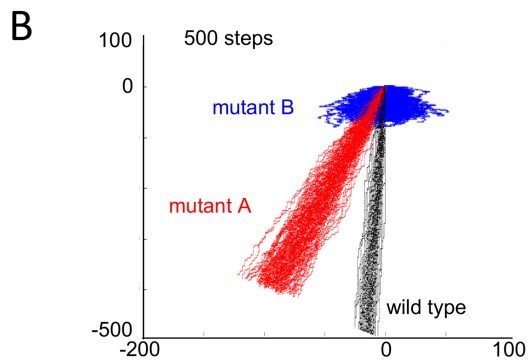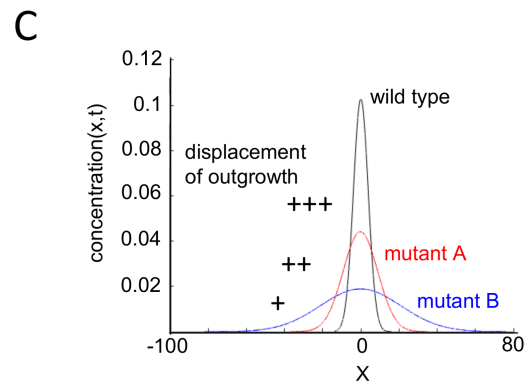

1237

1238 **Figure 6. Mutations have different effects on movement.** Examples of random walk  
1239 analyses using the direction of axon development from the HSN neuron in different mutants  
1240 (Table 1). The graphs were created as described in the figure legend of Figure 3. For each  
1241 panel, plots are shown for the normal distribution of the final position along the x axis for the  
1242 random walk tracks plotted in the inserts. The inserts depict the random walk movement that  
1243 would be produced by the probability distribution for the direction of outgrowth in the mutant.  
1244 Plots derived from the same data are colored alike. Each panel depicts the analyses of four  
1245 different mutants and wildtype. Three different distribution patterns are observed: (1) the  
1246 wild-type distribution, which has the distribution curve with the highest peak; (2) the *unc-5*,  
1247 *egl-20*, *unc-53*, and *unc-6* (not shown) distribution, which is flatter than the wild-type curve; (3)  
1248 the *madd-2*, *sax-3*, *mig-15*, and double combinations, which have the flattest distribution curve.  
1249

1250

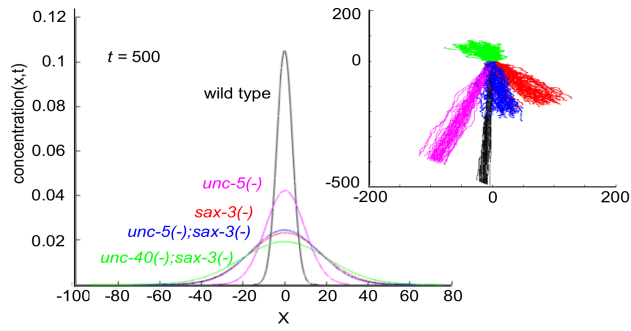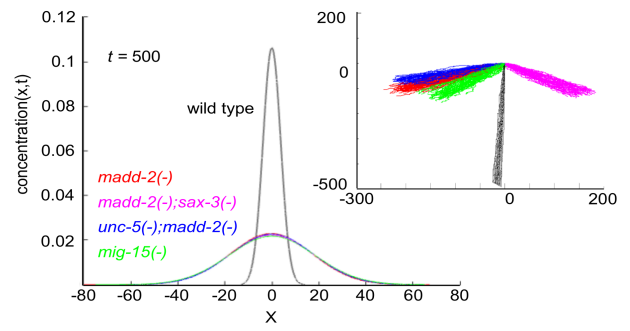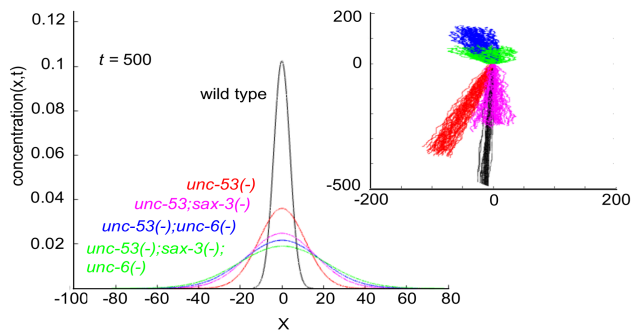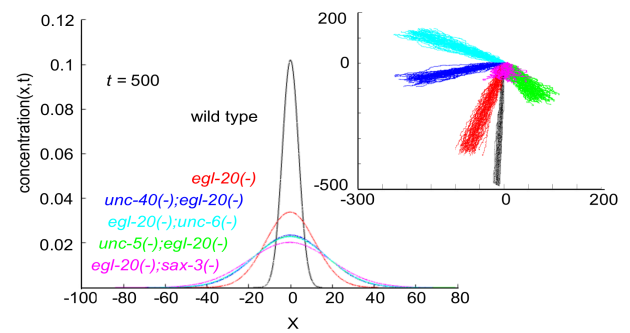

1251

1252 **Figure 7. Mutations alter the spatial extent of movement.** (A) Plotted are the mean  
1253 squared displacement (MSD) curves as a function of time interval ( $dt$ ). The values are in  
1254 arbitrary units, since the time scale was arbitrarily set at 1. The curves show the extent that  
1255 different mutations can alter the MSD relative to wildtype and the MSD caused by an unbiased  
1256 random walk. For each time interval, mean and s.e.m. are plotted. (B) From the slope of MSD  
1257 curves a coefficient can be derived that gives the relative rate of diffusion. Colored bars  
1258 correspond to the like-colored curves given in panel A. The coefficients for *unc-5*, *egl-20*, *unc-*  
1259 *53*, and *unc-6* form a class that is distinct from that derived from wildtype and from the double  
1260 mutants.

1261  
1262

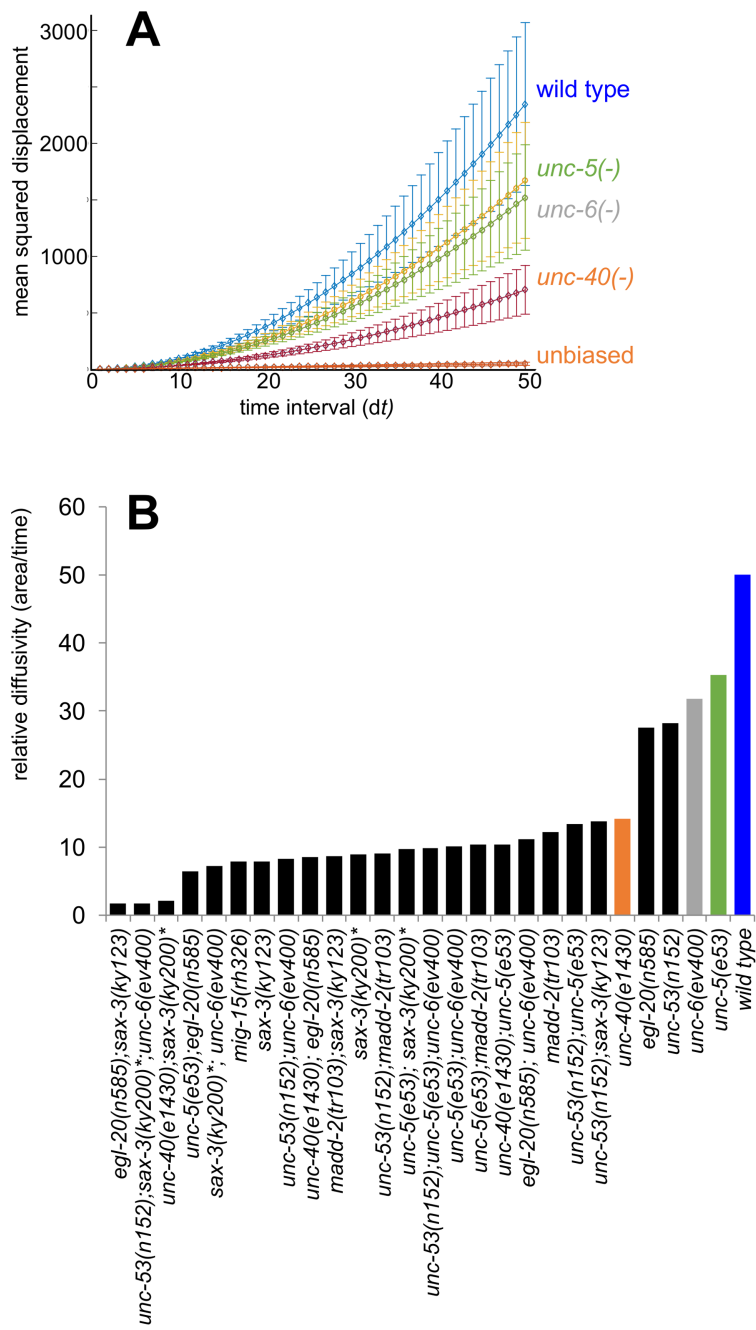

1263

1264

1265 **Figure 8. Models for the relationship between UNC-40-mediated outgrowth activity and**  
1266 **UNC-40 receptor clustering. (A)** In this model the self-organizing UNC-40 SOAL process  
1267 causes observable UNC-40 receptor clustering. Receptor clusters become stable and exit the  
1268 SOAL process, at which point they recruit the outgrowth machinery. Whereas the direction of  
1269 asymmetric receptor localization is determined stochastically, the direction of outgrowth is  
1270 determined by the site of stabilization. **(B)** In this model the self-organizing UNC-40 SOAL  
1271 process is coupled to the outgrowth machinery. The direction of both asymmetric receptor  
1272 localization and outgrowth activity are stochastically determined. Observable receptor  
1273 clustering may arise over time and these sites may become paramount for outgrowth  
1274 movement, but cluster formation is not a prerequisite for outgrowth activity. Conceptually, in  
1275 both models the site of outgrowth activity is determined by where UNC-40 receptor complexes  
1276 recruit the outgrowth machinery, however the second model postulates situations where there  
1277 are innumerable fluctuating sites that create outgrowth movement in various directions.  
1278 Because the effect at each instance of time of every outgrowth event is immeasurable,  
1279 outgrowth in this model is considered as a continuous stochastic process that evolves over  
1280 time.

1281

1282

1283

1284

1285



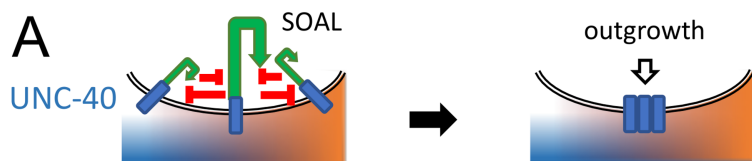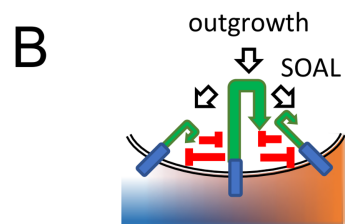

1286

1287

1288 **Figure 9. Mutations affect asymmetric intracellular UNC-40::GFP localization.** (A) Graph  
1289 indicating the dorsal-ventral localization of UNC-40::GFP in HSN. The graph shows the average  
1290 ratio of dorsal-to-ventral intensity from linescan intensity plots of the UNC-40::GFP signal  
1291 around the periphery of the HSN cell. UNC-40::GFP is ventrally localized in wildtype, but the  
1292 ratio is different in the mutants. Error bars represent standard error of mean. Below is a  
1293 graphic representation of the possible UNC-40 localization patterns when the intensity ratio is  
1294  $\geq 1$  or is  $< 1$ . (B) Graph indicating the anterior-posterior localization of UNC-40::GFP. To  
1295 determine orientation, line-scan intensity plots of the UNC-40::GFP signal across the dorsal  
1296 periphery of the HSN cell were taken, the dorsal surface was geometrically divided into three  
1297 equal segments, and the total intensity of each was recorded. The percent intensity was  
1298 calculated for each segment and ANOVA was used to determine if there is a significant  
1299 difference between the three segments (see Material and Methods). Whereas in the *unc-5* and  
1300 *egl-20* mutants there is a bias for anterior or posterior localization, there is a uniform  
1301 distribution in *unc-5;egl-20* double mutants. Uniform distribution is also observed in strong  
1302 loss-of-function *sax-3* and *madd-2* mutants. (\*) Animals grown at the *sax-3(ky200)* restrictive  
1303 temperature (25°C). Below is a graphic representation of the possible UNC-40 localization  
1304 patterns.  
1305

A. Dorsal-ventral orientation of UNC-40 asymmetric localization

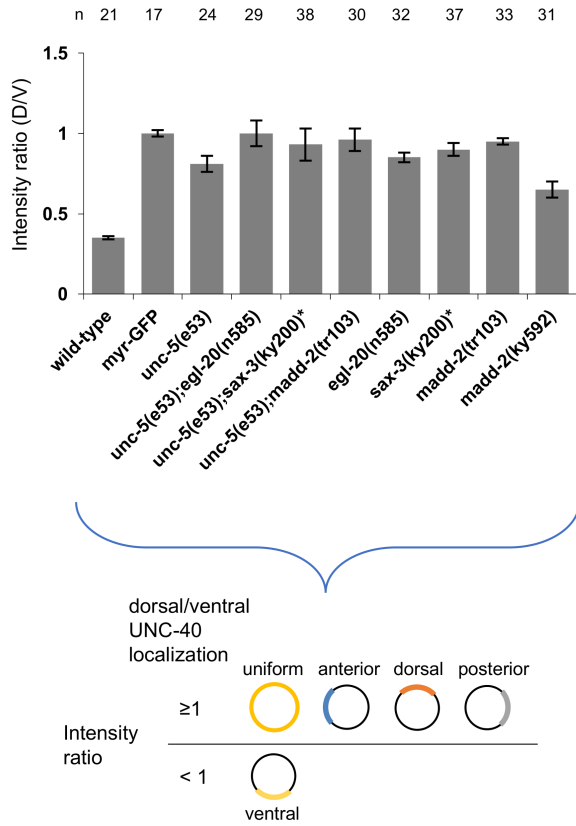

B. Anterior-posterior orientation of UNC-40 asymmetric localization

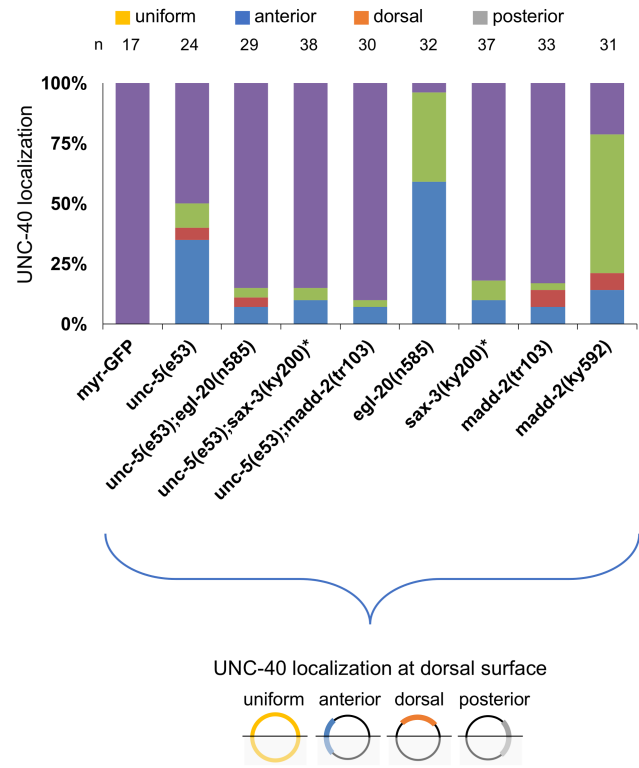

1306

1307

1308 **Figure 10. Model for the outgrowth movement of PLM.** Schematic diagrams of the  
1309 anteriorly directed outgrowth of PLM. The elements of the schematics are described in Figure  
1310 2. **(A)** At each of the four positions an extension encounters different levels of extracellular  
1311 cues. At position 3, a cue(s) is present that inhibits outgrowth activity. PLM extension  
1312 terminates in this area in wildtype, but in some mutants there is an overextension to position 4.  
1313 **(B)** Depicted are the effects that extracellular cues have on the relative probabilities of UNC-40-  
1314 mediated and nonUNC-40-mediated outgrowth activity at the different positions. At position 3  
1315 in wildtype the degree to which the direction of outgrowth activity fluctuates increases and the  
1316 extent of outgrowth movement decreases, stalling outgrowth. Because the SOAL process is  
1317 perturbed in the mutants, at position 3 the probability of outgrowth activity perpendicular to  
1318 the direction bias does not increase as much as in wildtype and the probability of anterior  
1319 outgrowth activity remains greater. This allows a stronger directional bias to persist, allowing  
1320 forward extension. To illustrate the concept, random walk models are shown which were  
1321 constructed using the indicated values for outgrowth in the anterior, dorsal, and ventral  
1322 directions. See text for details.

1323

1324

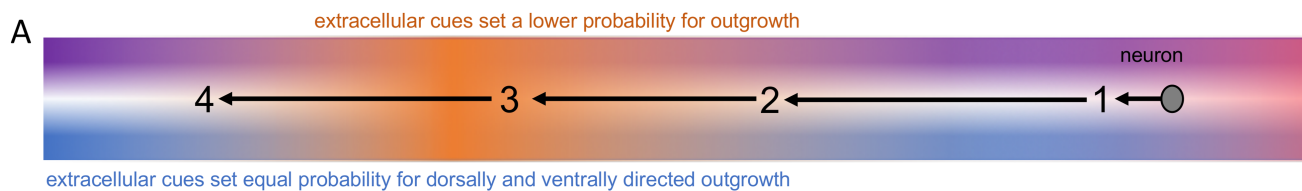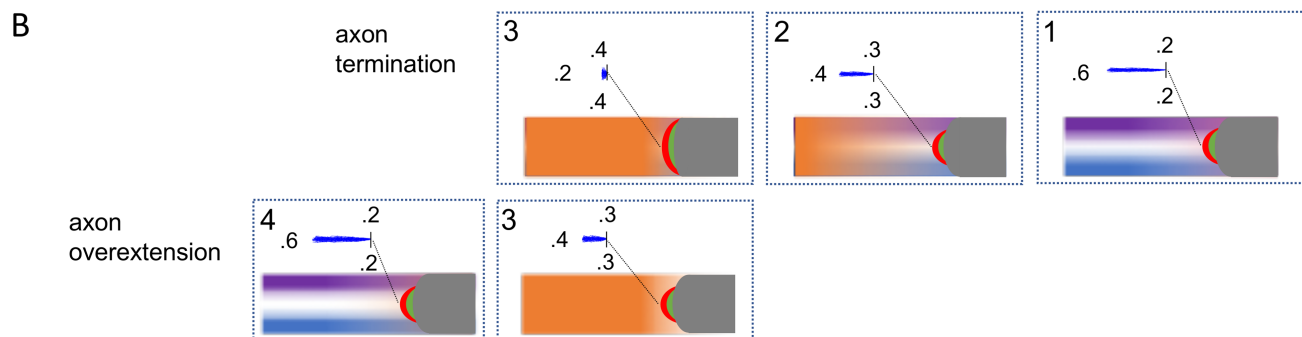

1325

1326

1327 **Figure 11. Model for the effects that mutations have on the outgrowth movement of PLM.**

1328 Schematic diagrams of PLM outgrowth at position 3 of Figure 10 in wildtype and mutants. The

1329 elements of the schematics are described in Figure 2. PLM outgrowth terminates in wildtype,

1330 *unc-40*, and *unc-5;mig-15* mutants, but overextends in *mig-15* mutants. See text for details.

1331

1332

figure 10, position 3

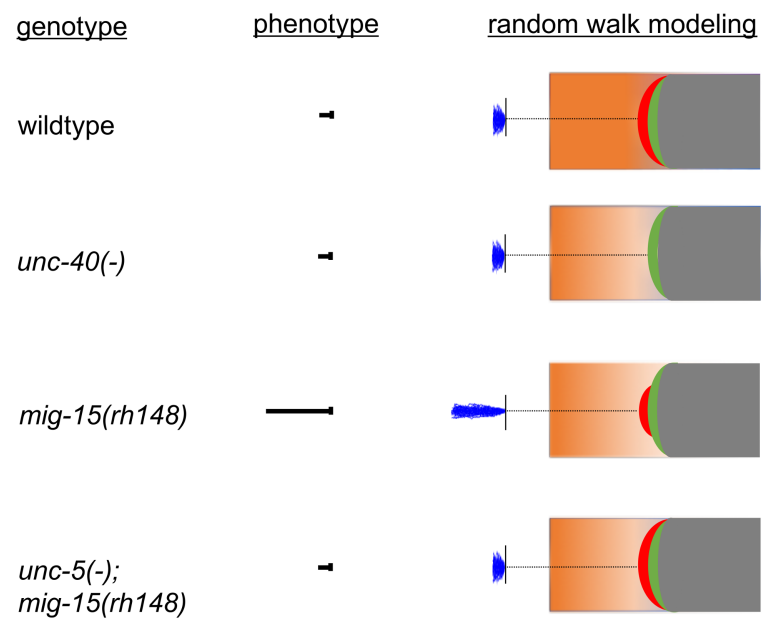

1333

1334

1335 **Figure 12. Model for the outgrowth movement of AVM at the nerve ring.** Schematic  
1336 diagrams of the outgrowth of AVM at the nerve ring. The elements of the schematics are  
1337 described in Figure 2. **(A)** At each of the four positions an extension encounters different  
1338 levels of extracellular cues. At position 2, a cue(s) at the nerve ring promotes UNC-40-mediated  
1339 outgrowth activity. From this position in wildtype, AVM extends further anteriorly and also  
1340 dorsally along the nerve ring. However, in some mutants either the anterior or dorsal  
1341 extension is absent. In other mutants, extension in both directions is absent. **(B)** Depicted are  
1342 the effects that extracellular cues have on the relative probabilities of UNC-40-mediated and  
1343 nonUNC-40-mediated outgrowth activity at the different positions. At position 2 in wildtype  
1344 the extracellular cues create a weak bias for outgrowth in both the anterior and dorsal  
1345 directions. Further dorsally at position 3, cues create an equal probability for outgrowth in the  
1346 anterior and posterior directions, allowing the nerve ring cue that promotes UNC-40-mediated  
1347 outgrowth to maintain a dorsal directional bias. Further anteriorly at position 4, cues create an  
1348 equal probability for outgrowth in the dorsal and ventral directions, allowing anterior cues that  
1349 promote outgrowth to create an anterior directional bias. To illustrate the concept, random  
1350 walk models are shown which were constructed using the indicated values for outgrowth in the  
1351 indicated directions. See text for details.

1352

1353

1354

1355

1356



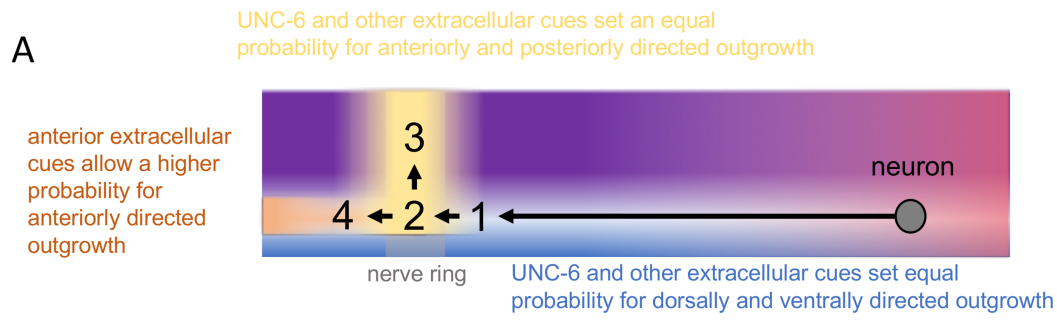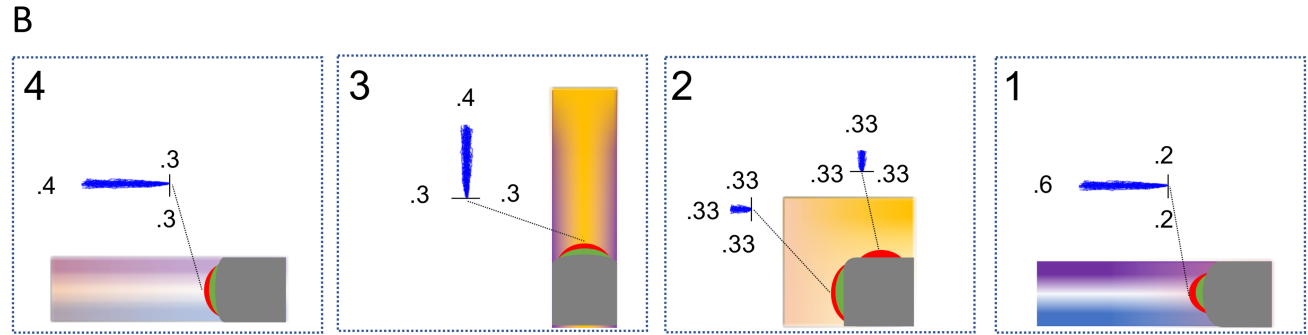

1359 **Figure 13. Model for the effects that mutations have on the outgrowth movement of AVM**  
1360 **at the nerve ring.** Schematic diagrams of AVM outgrowth at position 2 of Figure 12 in  
1361 wildtype and mutants. The elements of the schematics are described in Figure 2. AVM  
1362 outgrowth extends both anteriorly and dorsally from this position in wildtype, *mig-15*, and *unc-*  
1363 *40;mig-15* mutants. Dorsal extensions are often absent in *unc-40* mutants, whereas both  
1364 anterior and dorsal extensions are absent in *unc-5;mig-15* mutants. See text for details.

1365

1366

1367

1368

1369

figure 12, position 2

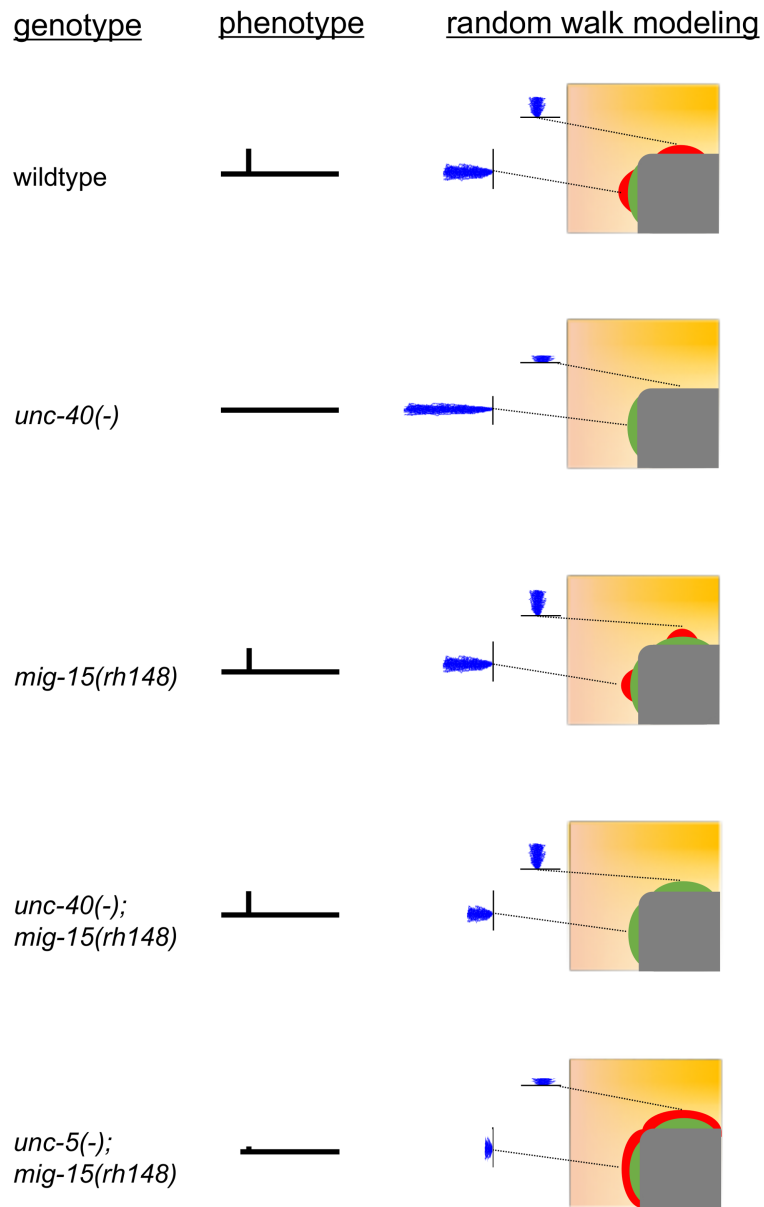

1370

1371

1372

1373 **Figure 14. Model for the outgrowth movement of HSN.** Schematic diagrams of the ventrally  
1374 directed outgrowth of HSN. The elements of the schematics are described in Figure 2. **(A)** At  
1375 each of the three positions an extension encounters different levels of extracellular cues. At  
1376 position 3, a cue(s) is present that promotes outgrowth activity. At the time when extension is  
1377 first observed in wildtype, extension is absent in some mutants. Nevertheless, ventral  
1378 extension will be complete in the mutants at about the same time as in wildtype. **(B)** Depicted  
1379 are the effects that extracellular cues have on the relative probabilities of UNC-40-mediated and  
1380 nonUNC-40-mediated outgrowth activity at the different positions. Compared to wildtype, at  
1381 position 1 in mutants with delayed protrusion the degree to which the direction of outgrowth  
1382 activity fluctuates is greater and the extent of outgrowth movement is less, resulting in a  
1383 reduced rate of outgrowth. A weak ventral directional bias develops in the mutant that allows  
1384 initial ventral extension and by position 2 this ventral bias is stronger. At position 3 in both  
1385 wildtype and mutant, the degree to which the direction of outgrowth activity fluctuates  
1386 increases and the extent of outgrowth movement decreases. To illustrate the concept, random  
1387 walk models are shown which were constructed using the indicated values for outgrowth in the  
1388 anterior, posterior, and ventral directions. See text for details.

1389

1390

1391

A

extracellular cues  
set an equal  
probability for  
anteriorly and  
posteriorly  
directed  
outgrowth

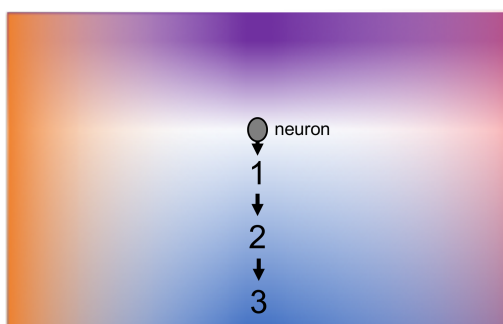

UNC-6 and other extracellular cues set higher probability for ventrally directed outgrowth

B wildtype

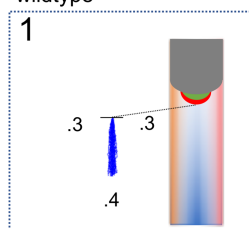

delayed protrusion

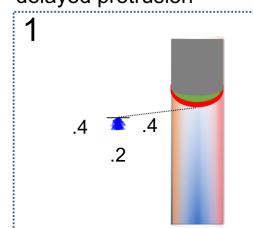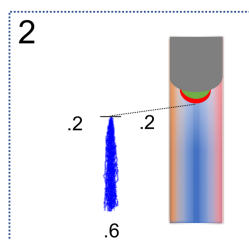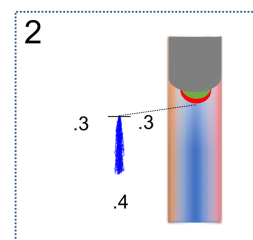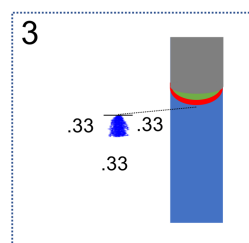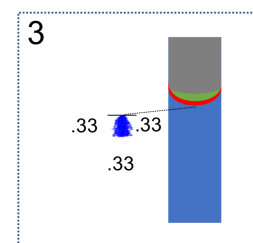

1392

1393 **Figure 15. Model for the effects that mutations have on the outgrowth movement of HSN.**

1394 **(A)** Schematic diagrams of HSN outgrowth at position 1 of Figure 14 in wildtype and mutants.

1395 The elements of the schematics are described in Figure 2. HSN outgrowth is delayed in *unc-5*

1396 mutants and can develop multiple processes in *mig-15* mutants. The multiple process

1397 phenotype is suppressed in *unc-5;mig-15* mutants. See text for details. **(B)** Schematic diagrams

1398 of the development of multiple process that maintain the same directional bias. The process is

1399 shown in three steps. At the first step, UNC-40 receptors (blue rectangles) are trafficked to the

1400 membrane as part of the UNC-40 SOAL process (blue arrows). At the second step, UNC-5

1401 signaling alters the trafficking, increasing the rates anterior (orange arrows) and posterior (red

1402 arrows). By the third step, the rate of outgrowth at the flanking regions is greater. We propose

1403 that UNC-40, UNC-5, and UNC-6 can be considered as components of an activator-inhibitor

1404 system which allows outgrowth patterns to self-organize. See text for details.

1405

1406

1407

1408

1409

1410

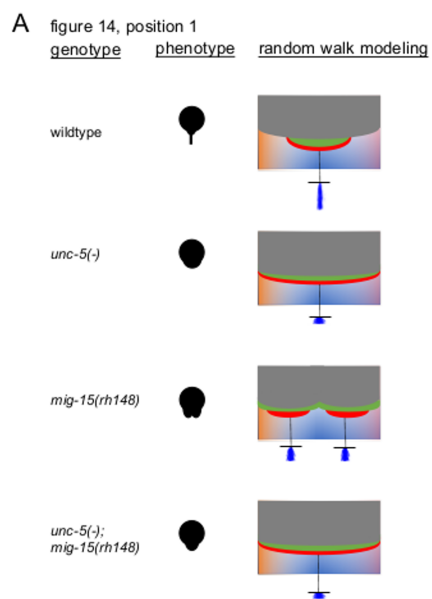

1411

1412

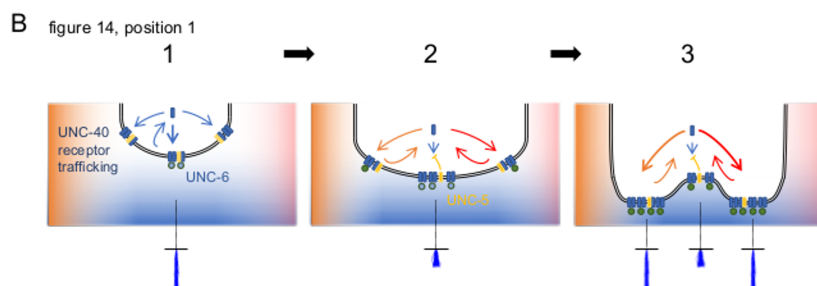

1413 **Figure 16. Genetic pathways for self-organizing UNC-40 asymmetric localization. (A)**

1414 Table summarizing the results of experiments previously reported and described in Figure 9 of

1415 this paper. **(B)** The genetic data support a model whereby the UNC-6 and EGL-20 extracellular

1416 cues regulate at least three pathways leading to robust asymmetric UNC-40 localization.

1417 Robust asymmetric UNC-40 localization refers to the ability to observe UNC-40::GFP clustering

1418 at the surface of the neuron. Arrows represent activation; bars represent repression. See text

1419 for the logic used to construct the pathways.

1420



**A**

| loss-of-function                        | robust asymmetric UNC-40 localization | reference                  |
|-----------------------------------------|---------------------------------------|----------------------------|
| <i>unc-6</i>                            | no                                    | (Kulkarni et al., 2013)    |
| <i>unc-5</i>                            | yes                                   | (Kulkarni et al., 2013)    |
| <i>unc-5</i> <i>unc-6</i>               | no                                    | (Kulkarni et al., 2013)    |
| <i>unc-5</i> <i>egl-20</i>              | no                                    |                            |
| <i>unc-5</i> <i>sax-3</i>               | no                                    |                            |
| <i>unc-5</i> <i>unc-53</i>              | no                                    | (Kulkarni et al., 2013)    |
| <i>unc-5</i> <i>unc-53</i> <i>unc-6</i> | yes                                   | (Kulkarni et al., 2013)    |
| <i>unc-5</i> <i>unc-53</i> <i>sax-3</i> | no                                    |                            |
| <i>unc-5</i> <i>madd-2</i>              | no                                    |                            |
| <i>unc-6</i> <i>unc-53</i>              | yes                                   | (Kulkarni et al., 2013)    |
| <i>unc-6</i> <i>sax-3</i>               | no                                    | (Tang and Wadsworth, 2014) |
| <i>unc-6</i> <i>unc-53</i> <i>sax-3</i> | no                                    | (Tang and Wadsworth, 2014) |
| <i>egl-20</i>                           | yes                                   | (Kulkarni et al., 2013)    |
| <i>egl-20</i> <i>unc-53</i>             | yes                                   | (Kulkarni et al., 2013)    |
| <i>egl-20</i> <i>unc-6</i>              | no                                    | (Kulkarni et al., 2013)    |
| <i>egl-20</i> <i>sax-3</i>              | no                                    | (Tang and Wadsworth, 2014) |
| <i>sax-3</i>                            | no                                    | (Tang and Wadsworth, 2014) |
| <i>sax-3</i> <i>unc-53</i>              | no                                    | (Tang and Wadsworth, 2014) |
| <i>unc-53</i>                           | yes                                   | (Kulkarni et al., 2013)    |
| <i>madd-2</i>                           | no                                    |                            |
| <i>mig-15</i>                           | yes                                   | (Yang et al., 2014)        |

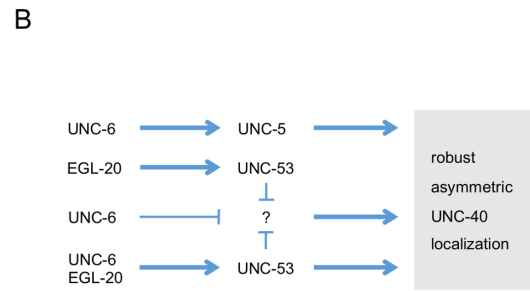

1421
